1 A combined *in silico*, *in vitro* and clinical approach to characterise novel pathogenic  
2 missense variants in PRPF31 in retinitis pigmentosa

3 **Gabrielle Wheway<sup>1,2\*</sup>, Liliya Nazlamova<sup>1,2</sup>, Nervine Meshad<sup>3</sup>, Samantha Hunt<sup>3</sup>, Nicola  
4 Jackson<sup>4</sup>, Amanda Churchill<sup>3\*</sup>**

5 <sup>1</sup> Centre for Research in Biosciences, University of the West of England, Bristol, UK

6 <sup>2</sup> Human Development and Health, University of Southampton, Southampton, UK

7 <sup>3</sup> Bristol Eye Hospital, University Hospitals Bristol NHS Foundation Trust, Bristol, UK

8 <sup>4</sup> Clinical Genetics Service, University Hospitals Bristol NHS Foundation Trust, Bristol, UK

9

10 **\* Correspondence:**

11 Gabrielle Wheway

12 [Gabrielle.Wheway@uwe.ac.uk](mailto:Gabrielle.Wheway@uwe.ac.uk); [G.Wheway@soton.ac.uk](mailto:G.Wheway@soton.ac.uk)

13 Amanda J Churchill

14 [A.J.Churchill@bristol.ac.uk](mailto:A.J.Churchill@bristol.ac.uk)

15

16 **Keywords: genetic disease, modelling, pathogenicity, missense, pre-mRNA splicing factor,  
17 retinitis pigmentosa, retinal ciliopathy.**

18 **Abstract**

19 At least six different proteins of the spliceosome, including PRPF3, PRPF4, PRPF6, PRPF8, PRPF31  
20 and SNRNP200, are mutated in autosomal dominant retinitis pigmentosa (adRP). These proteins  
21 have recently been shown to localise to the base of the connecting cilium of the retinal photoreceptor  
22 cells, elucidating this form of RP as a retinal ciliopathy. In the case of loss-of-function variants in  
23 these genes, pathogenicity can easily be ascribed. In the case of missense variants, this is more  
24 challenging. Furthermore, the exact molecular mechanism of disease in this form of RP remains  
25 poorly understood.

26 In this paper we take advantage of the recently published cryo EM-resolved structure of the entire  
27 human spliceosome, to predict the effect of a novel missense variant in one component of the  
28 spliceosome; PRPF31, found in a patient attending the genetics eye clinic at Bristol Eye Hospital.  
29 Monoallelic variants in *PRPF31* are a common cause of autosomal dominant retinitis pigmentosa  
30 (adRP) with incomplete penetrance. We use *in vitro* studies to confirm pathogenicity of this novel  
31 variant *PRPF31* c.341T>A, p.Ile114Asn.

32 This work demonstrates how *in silico* modelling of structural effects of missense variants on cryo-  
33 EM resolved protein complexes can contribute to predicting pathogenicity of novel variants, in  
34 combination with *in vitro* and clinical studies. It is currently a considerable challenge to assign  
35 pathogenic status to missense variants in these proteins.

## 36 1 Introduction

37 Retinitis pigmentosa (RP) is a progressive retinal degeneration characterised by night blindness and  
38 restriction of peripheral vision. Later in the course of the disease, central and colour vision can be  
39 lost. Many patients experience the first signs of RP between 20-40 years but there is much  
40 phenotypic variability from age of onset and speed of deterioration to severity of visual impairment  
41 (Hartong *et al.*, 2006).

42 RP, whilst classified as a rare disease, is the most common cause of inherited blindness worldwide. It  
43 affects between 1:3500 and 1:2000 people (Golovleva *et al.*, 2010; Sharon and Banin, 2015), and can  
44 be inherited in an autosomal dominant (adRP), autosomal recessive (arRP), or X-linked (xLRP)  
45 manner. It may occur in isolation (non-syndromic RP) (Verbakel *et al.*, 2018), or with other features  
46 (syndromic RP) as in Bardet-Biedl syndrome, Joubert syndrome and Usher syndrome (Mockel *et al.*,  
47 2011).

48 The condition is extremely heterogeneous, with 64 genes identified as causes of non-syndromic RP,  
49 and more than 50 genes associated with syndromic RP (RetNet [https://sph.uth.edu/retnet/sum-  
50 dis.htm](https://sph.uth.edu/retnet/sum-dis.htm)). Even with current genetic knowledge, diagnostic detection rate in adRP cohorts remains  
51 between 40% (Mockel *et al.*, 2011) and 66% (Zhang *et al.*, 2016), suggesting that many disease  
52 genes remain to be identified, and many mutations within known genes require characterization to  
53 ascribe pathogenic status. Detection rates are as low as 14% in cohorts of simplex cases (single  
54 affected individuals) and multiplex cases (several affected individuals in one family but unclear  
55 pattern of inheritance) (Jin *et al.*, 2008). Such cases account for up to 50% of RP cases, so this

## Modelling missense variants in *PRPF31*

56 presents a significant challenge to diagnosis (Greenberg *et al.*, 1993; Haim, 1993; Najera *et al.*,  
57 1995).

58 The second most common genetic cause of adRP is *PRPF31*, accounting for 6% of US cases  
59 (Sullivan *et al.*, 2013) 8% of Spanish cases (Martin-Merida *et al.*, 2018), 8% of French Canadian  
60 cases (Coussa *et al.*, 2015), 8% of French cases (Audo *et al.*, 2010), 8.9% of cases in North America  
61 (Daiger *et al.*, 2014), 11.1% in small Chinese cohort (Lim *et al.*, 2009), 10% in a larger Chinese  
62 cohort (Xu *et al.*, 2012) and 10.5% of Belgian cases (Van Cauwenbergh *et al.*, 2017). However, this  
63 is likely to be an underestimate due to variable penetrance of this form of RP, complicating attempts  
64 to co-segregate the variant with clinical disease, making genetic diagnosis difficult.

65 Whilst the majority of reported variants in *PRPF31* are indels, splice site variants and nonsense  
66 variants, large-scale deletions or copy number variations (Martin-Merida *et al.*, 2018), which are  
67 easily ascribed pathogenic status, at least eleven missense variants in *PRPF31* have been reported in  
68 the literature (**Table 1**). Missense variants are more difficult to characterize functionally than  
69 nonsense or splicing mutations (Cooper and Shendure, 2011) and it is likely that there are false  
70 negative diagnoses in patients carrying missense mutations due to lack of confidence in prediction of  
71 pathogenicity of such variants. This is reflected in the enrichment of *PRPF31* missense variants  
72 labelled ‘uncertain significance’ in ClinVar, a public repository for clinically-relevant genetic  
73 variants (Landrum *et al.*, 2016; Landrum *et al.*, 2014). Furthermore, work has shown that some  
74 variants annotated as missense *PRPF31* variants may in fact be affecting splicing of *PRPF31*,  
75 introducing premature stop codons leading to nonsense mediated decay (NMD), a common disease  
76 mechanism in RP11 (Rio Frio *et al.*, 2008). One example is c.319C>G, which, whilst originally  
77 annotated as p.Leu107Val, actually affects splicing rather than an amino acid substitution (Rio Frio *et*  
78 *al.*, 2008). The presence of exonic splice enhancers is often overlooked by genetics researchers.

79 *PRPF31* is a component of the spliceosome, the huge macromolecular ribonucleoprotein (RNP)  
80 complex which catalyses the splicing of pre-messenger RNAs (pre-mRNAs) to remove introns and  
81 produce mature mRNAs (Will and Luhrmann, 2011). The spliceosome is composed of 5 small  
82 nuclear RNAs (snRNAs), U1-U5, and many proteins including pre-mRNA splicing factors *PRPF3*,  
83 *PRPF4*, *PRPF6*, *PRPF8*, and *SNRNP200*, all of which are also genetic causes of RP (Ruzickova and  
84 Stanek, 2016). It is unclear whether variants in these proteins have an effect on splicing of specific  
85 retinal transcripts (Deery *et al.*, 2002; Yuan *et al.*, 2005; Mordes *et al.*, 2007; Wilkie *et al.*, 2008).  
86 Some papers have failed to find any evidence for a generalized RNA splicing defects (Rivolta *et al.*,

87 2006). Pre-mRNA splicing factors may have additional roles beyond splicing in the nucleus, after a  
88 study recently found that PRPF6, PRPF8 and PRPF31 are all localized to the base of the retinal  
89 photoreceptor connecting cilium and are essential for ciliogenesis, suggesting that this form of RP is  
90 a ciliopathy (Wheway *et al.*, 2015). Missense variants in these proteins are, collectively, a common  
91 cause of adRP. This presents significant challenges in providing accurate diagnosis for patients with  
92 missense variants in these genes. Developing tools to provide accurate genetic diagnoses in these  
93 cases is a significant clinical priority.

94 The most commonly used *in silico* predictors of pathogenicity of missense variants, PolyPhen2  
95 (Adzhubei *et al.*, 2010) and CADD (Kircher *et al.*, 2014), which use combined sequence  
96 conservation, structural and machine learning techniques only have around 15 – 20% success rate in  
97 predicting truly pathogenic variants (Miosge *et al.*, 2015). Use of simple tools has around the same  
98 success rate (Gnad *et al.*, 2013), and use of several tools in combination increases reliability  
99 (Gonzalez-Perez and Lopez-Bigas, 2011). Insight from structural biologists and molecular cell  
100 biologists is essential to make accurate predictions.

101 In this study we take advantage of the recently elucidated structure of the in-tact spliceosome to  
102 model the effect of a novel variant in *PRPF31*, found in a patient attending the genetics eye clinic at  
103 Bristol Eye Hospital. We combine this *in silico* analysis with *in vitro* studies to characterize this  
104 novel variant. We show that analysis of protein complexes *in silico* can complement clinical and  
105 laboratory studies in predicting pathogenicity of novel genetic variants.

## 106 **Methods**

### 107 Genetic testing

108 The study was conducted in accordance with the Declaration of Helsinki. Informed consent for  
109 diagnostic testing was obtained from the proband in clinic. Genomic DNA was extracted from a  
110 peripheral blood sample by Bristol Genetics Laboratory and tested against the retinal dystrophy panel  
111 of 176 genes in the NHS accredited Genomic Diagnostics Laboratory at Manchester Centre for  
112 Genomic Medicine, UK.

### 113 Splicing analysis

114 We used Human Splicing Finder (Desmet *et al.*, 2009) to identify and predict the effect of variants on  
115 splicing motifs, including the acceptor and donor splice sites, branch point and auxiliary sequences

## Modelling missense variants in PRPF31

116 known to enhance or repress splicing. This programme uses 12 different algorithms to make a  
117 comprehensive prediction of the effect of variants on splicing.

### 118 3D structural protein analysis

119 PyMol (Schrodinger Ltd) programme was used to characterize the effect of missense variants in  
120 human *PRPF31* protein. Missense variants were modelled on PRPF31 in the pre-catalytic  
121 spliceosome primed for activation (PDB file 5O9Z) (Bertram *et al.*, 2017).

### 122 Variant construct cloning

123 Full-length, sequence-validated *PRPF31* ORF clone with C-terminal myc tag was obtained from  
124 Origene. c.341T>A variant was introduced using NEB Q5 site-directed mutagenesis kit. The entire  
125 wild-type and mutant clone sequence was verified by Sanger sequencing (Source Bioscience).

### 126 Cell culture

127 HEK293 cells were cultured in DMEM high glucose + 10% FCS at 37°C, 5% CO<sub>2</sub>, and split at a  
128 ratio of 1:8 once per week. hTERT-RPE1 cells (ATCC CRL-4000) were cultured in DMEM/F12  
129 (50:50 mix) + 10% FCS at 37°C, 5% CO<sub>2</sub>, and split at a ratio of 1:8 once per week.

### 130 Cell transfection

131 The construct was transfected into HEK293 cells using PEI, and into hTERT-RPE1 cells using the  
132 Lonza Nucleofector.

### 133 Inhibition of protein translation

134 Cells were grown for 72 hours, and treated with 30µg/ml cycloheximide in DMSO. Untreated cells  
135 were treated with the equivalent volume of DMSO.

### 136 Protein extraction

137 Total protein was extracted from cells using 1% NP40 lysis buffer and scraping. Insoluble material  
138 was pelleted by centrifugation at 10,000 x g. Cell fractionation was carried out by scraping cells into  
139 fractionation buffer containing 1mM DTT, and passed through a syringe 10 times. Nuclei were  
140 pelleted at 720 x g for 5 minutes and separated from the cytoplasmic supernatant. Insoluble  
141 cytoplasmic material was pelleted using centrifugation at 10,000 x g for 5 minutes. Nuclei were

142 washed, and lysed with 0.1% SDS and sonication. Insoluble nuclear material was pelleted using  
143 centrifugation at 10,000 x g for 5 minutes.

#### 144 SDS-PAGE and western blotting

145 20µg of total protein per sample with 2 x SDS loading buffer was loaded onto pre-cast 4-12% Bis-  
146 Tris gels (Life Technologies) alongside Spectra Multicolor Broad range Protein ladder (Thermo  
147 Fisher). Samples were separated by electrophoresis. Protein was transferred to PVDF membrane.  
148 Membranes were incubated with blocking solution (5% (w/v) non-fat milk/PBS), and incubated with  
149 primary antibody overnight at 4°C. After washing, membranes were incubated with secondary  
150 antibody for 1 hour at room temperature and exposed using 680nm and/or 780nm laser, or incubated  
151 with SuperSignal West Femto reagent (Pierce) and exposed using Chemiluminescence settings on  
152 LiCor Odyssey imaging system (LiCor).

#### 153 Primary antibodies for WB

154 Mouse anti β actin clone AC-15. 1:4000. Sigma-Aldrich A1978

155 Goat anti-PRPF31 primary antibody 1:1000 (AbNova)

156 Mouse anti-c myc 1:5000 (Sigma)

157 Mouse anti PCNA-HRP conjugated 1:1000 (BioRad)

#### 158 Secondary antibodies for WB

159 Donkey anti mouse 680 1:20,000 (LiCor)

160 Donkey anti goat 800 1:20,000 (LiCor)

#### 161 Immunocytochemistry

162 Cells were seeded at  $1 \times 10^5$  per mL on sterile glass coverslips in complete media. Media was  
163 changed to serum-free media after 48 hours, and cells were grown for a further 72 hours. Cells were  
164 fixed in ice-cold methanol at -20°C for 5 minutes, immediately washed with PBS, and incubated with  
165 blocking solution (1% w/v non-fat milk powder/PBS). Coverslips were incubated with primary  
166 antibodies at 4°C overnight and with secondary antibodies and DAPI for 1 hour at room temperature.  
167 Cells were mounted onto slides with Mowiol.

#### 168 Primary antibodies for IF

169 Goat anti-PRPF31 primary antibody 1:200 (AbNova)

## Modelling missense variants in *PRPF31*

170 Mouse anti-c myc 1:1000 (Sigma)

171 Secondary antibodies for IF

172 Donkey anti mouse IgG AlexaFluor 488 1:500

173 Donkey anti goat IgG AlexaFluor 633 1:500

174 Confocal imaging

175 Confocal images were obtained at the Centre for Research in Biosciences Imaging Facility at UWE  
176 Bristol, using a HC PL APO 63x/1.40 oil objective CS2 lens on a Leica DMI8 inverted  
177 epifluorescence microscope, attached to a Leica SP8 AOBS laser scanning confocal microscope.  
178 Images were captured using LASX software, assembled in Adobe Photoshop, and figures prepared  
179 using Adobe Illustrator.

180

## 181 **Results**

### 182 **Clinical description of c.341T>A p.Ile114Asn patient**

183 A 39 year old female presented to the Genetic Eye clinic at Bristol Eye Hospital in 2013 complaining  
184 of some difficulty with dark adaptation, driving at night and a reduction in her field of vision (having  
185 to turn her head to see her children). She described other family members having similar symptoms  
186 and losing their sight at a relatively young age (**Figure 1a**). Her general health was otherwise good.  
187 Over a 4 year period her best corrected visual acuity remained good at 6/6-3 right eye and 6/7.5 left  
188 eye (Snellen equivalent using a LogMar chart) whilst her peripheral vision deteriorated from an  
189 isolated mid-peripheral scotoma to tunnel vision by 2017. Fundoscopy showed widespread bilateral  
190 bone spicule pigmentation, attenuated retinal vessels and pale optic nerves typical of RP (**Figure 1b**).  
191 There was no evidence of lens opacities or macula oedema in either eye.

### 192 **Variant Analysis of c.341T>A p.Ile114Asn**

193 A heterozygous *PRPF31* change, c.341T>A p.(Ile114Asn) was identified which was confirmed by  
194 bidirectional Sanger sequencing. This variant is not present in the heterozygous or homozygous state  
195 in any individuals within the gnomAD database, nor are any other variants affecting Ile114,  
196 suggesting that this is a highly conserved residue. Analysis by PolyPhen2 suggested this change was  
197 probably damaging, with a score of 0.963 (**Figure 1c**) and SIFT concurred with this prediction with a

198 score of 0.0. Comparative genomic alignment shows the residue to be conserved from humans to  
199 amphibia, within a highly conserved region, conserved across diverse metazoa including sponges  
200 (**Figure 1c**).

### 201 **Splicing analysis of genetic single nucleotide variants in *PRPF31***

202 We undertook *in silico* splicing analysis of our novel variant of interest c.341T>A p. Ile114Asn and  
203 found that it was not predicted to affect splicing. We also studied the nine published variants in  
204 *PRPF31* annotated as missense, and interestingly, five were predicted to potentially alter splicing,  
205 and one (c.1373A>T, p. Gln458Leu (Xiao *et al.*, 2017)) was predicted to be highly likely to affect  
206 splicing (**Table 2**). This suggests that either this splice predictor should be used with caution, or that  
207 p.Gln458Leu may be mis-annotated as a missense variant, when it actually affects splicing. We  
208 suggest that this variant should be a priority for further functional characterization *in vitro*.

### 209 **3D structural analysis of missense variants in PRPF31**

210 We mapped all published missense variants onto the PRPF31 protein structure in the pre-catalytic  
211 spliceosome. For simplicity, we only show PRPF31 in complex with U4 snRNA and 15.5K (SNU13)  
212 protein (**Figure 2**) and (in complex with PRPF6 in **Supplementary Figure 1**; in complex with  
213 PRPF8 in **Supplementary Figure 2**). This showed that variants are located throughout the protein,  
214 but concentrated in several key domains. Three variants (Arg288Trp, Ala291Pro and Cys299Arg),  
215 are located in  $\alpha$ -helix 12 of the protein, in the Nop domain which interacts with RNA and the 15.5K  
216 (SNU13) protein. Three variants are in  $\alpha$ -helix 6 of the coiled-coil domain (Ala194Glu, Leu197Pro,  
217 Ala216Pro) and one variant is in  $\alpha$ -helix 3 of the protein in the coiled-coil tip (Thr138Lys).  
218 Gly261Arg is within the flexible loop between the Nop and coiled-coil domains and Arg408Trp  
219 alone is in the C-terminal domain.

220 Analysis of interactions within 4Å of each amino acid show that in most cases (Thr138Lys,  
221 Ala194Glu, Gly261Arg, Arg288Trp, Ala291Pro and Cys299Arg), these substitutions are predicted to  
222 affect hydrogen (H) bonding in PRPF3. H bonds with donor-acceptor distances of 2.2-2.5 Å are  
223 strong and mostly covalent; 2.5-3.2 Å are moderate mostly electrostatic and 3.2-4 are weak  
224 electrostatic interactions and can be predicted to be affecting protein folding and solubility (Jeffrey  
225 1997). In the case of Arg408Trp, the substitution does not affect H bonding within PRPF31, but does  
226 introduce a new interaction with neighbouring PRPF6 (**Figure 3a**; **Supplementary Figures 1 and**  
227 **2**). Gly261Arg also introduces a new interaction with neighbouring PRPF8 (**Figure 3b**;



## Modelling missense variants in PRPF31

228 **Supplementary Figure 2**). Of the three small substitutions which do not affect H bonding, we  
229 discovered that in all cases the variant amino acid was proline, which introduces a new kink in the  
230 amino acid chain. Each of these substitutions also resulted in the loss of a polar contact (**Figure**  
231 **3c,d,e**).

232 We next mapped the variant found in our patient attending the genetics eye clinic at Bristol Eye  
233 Hospital; Ile114Asn (**Figure 4a**). Ile114Asn is in the coiled-coil domain of the protein, in close  
234 proximity to published pathogenic variants Thr138Lys and Ala194Glu (**Figure 4b**). The substitution  
235 introduces new H bonds between this residue and Ala190 of an adjacent  $\alpha$ -helix, and predict it to  
236 affect protein folding and solubility, and be pathogenic.

237 To test the accuracy of our predictions, we took on c.341T>A p.Ile114Asn for further *in vitro*  
238 characterisation.

### 239 ***In vitro* analysis of c.341T>A p.Ile114Asn variant**

240 To investigate whether c.341T>A p.Ile114Asn caused mislocalisation of the protein, we transfected  
241 RPE1 cells with plasmids expressing either wild-type (WT) PRPF31 or PRPF31 341T>A, both  
242 tagged with c-myc epitope tag. We used the Lonza nucleofector to ensure high transfection efficiency  
243 (~75%). We assayed the cells after 24, 48 and 72 hours by immunofluorescence confocal microscopy  
244 using an anti-cmyc antibody and saw consistent mid- to high-level expression of the WT protein  
245 exclusively in the nucleus (**Figure 5a**). We did not observe the same pattern in cells expressing the  
246 mutant protein. In these cells, intense c-myc staining was seen in the nuclei of a subset of cells, and  
247 no cells showed normal nuclear expression levels (**Figure 5a**). After 72 hours, many cells in the  
248 mutant experiment had died, or showed abnormal nuclear morphology (**Figure 5b**). We hypothesised  
249 that the mutant protein was aggregating in the nuclei and causing cell death.

250 In order to investigate whether c.341T>A p.Ile114Asn affected protein stability in a similar way, we  
251 transfected HEK293 cells with plasmids expressing either wild-type PRPF31 or PRPF31 341T>A,  
252 both tagged with c-myc epitope tag. We treated the transfected cells with cycloheximide protein  
253 translation inhibitor over a time course of 6 hours, and assayed protein concentration over this period  
254 via western blotting.

255 Following our usual method for total protein extraction from cells using 1% NP40 detergent, we had  
256 difficulty extracting any mutant protein from the transfected cells (**Figure 6a**). This was despite the

257 fact that we could observe protein expression in both cell types via immunofluorescent staining with  
258 anti-PRPF31 and anti-cmyc antibodies. We proceeded to repeat the experiment using cell  
259 fractionation, to selectively extract protein from the nuclear fraction using 0.1% SDS. This yielded a  
260 small amount of mutant protein (**Figure 6b**). Based on our observations, we hypothesised that the  
261 mutant protein was in the insoluble nuclear fraction. Once again, we fractionated the cells and lysed  
262 the nuclei with 0.1% SDS, but this time we did not remove the insoluble material by centrifugation,  
263 instead loading both soluble and insoluble nuclear protein on the gel. This revealed mutant protein,  
264 and confirms that the mutant protein is expressed in cells, but is insoluble (**Figure 6c**). No difference  
265 in protein stability was observable in the course of cycloheximide treatment (**Figure 6c**). Once we  
266 had optimised protein extraction from these cells, we were able to confirm our finding from  
267 immunofluorescent imaging that both the WT and mutant protein localised to the nucleus, not the  
268 cytoplasm (**Figure 6d**).

269 In summary, our findings suggest that c.341T>A p.Ile114Asn variant in *PRPF31* results in protein  
270 insolubility, leading to cell death, and is likely the pathogenic cause of RP in this individual. In silico  
271 structural analysis of this variant complemented existing techniques for predicting pathogenicity of  
272 this variant.

## 273 Discussion

274 PRPF31 is a component of the major and minor spliceosome, the huge macromolecular  
275 ribonucleoprotein (RNP) complex which catalyses the splicing of pre-messenger RNAs (pre-  
276 mRNAs) to remove introns and produce mature mRNAs. More than 90% of human genes undergo  
277 alternative splicing (Wang *et al.*, 2008), and splicing is a core function of cells, remarkably well  
278 conserved from yeast to man. The spliceosome is composed of at least 43 different proteins, and 5  
279 small nuclear RNAs (snRNAs), U1-U5 (Will and Luhrmann, 2011).

280 PRPF31 is essential for the assembly of the U4/U6.U5 tri-snRNP complex (Makarova *et al.*, 2002),  
281 which, when combined with U1 and U2, forms the ‘B complex’. After large rearrangements, the  
282 activated B complex is able to initiate the first step of splicing. In the absence of PRPF31, U4/U6 di-  
283 snRNP accumulates in the splicing-rich Cajal bodies in the nucleus, preventing formation of the tri-  
284 snRNP, and subsequently efficient splicing (Schaffert *et al.*, 2004).

285 PRPF31 performs its function through several important protein domains; the flexible loop, Nop  
286 domain, coiled-coil domain and tip. The flexible loop (residues 256 – 265) protects the exposed C4’

## Modelling missense variants in PRPF31

287 atoms of residues 37 and 38 from attack by free radicals, to protect the RNA without directly  
288 contacting it (Liu *et al.*, 2007).

289 The Nop domain is a conserved RNP-binding domain, with regions for binding protein and RNA.  
290 Although the sequence conservation of the Nop domain is relaxed in PRPF31, its specificity for  
291 binding U4 or U4atac and 15.5K protein is high (Liu *et al.*, 2007).

292 Nonsense, missense and indel mutations in PRPF31 are associated with autosomal dominant RP with  
293 incomplete penetrance. Whilst the pathogenicity nonsense and indels is easy to ascribe, the  
294 pathogenicity of missense mutations in this protein are difficult to predict. Alongside use of  
295 pathogenicity predictors based on 2D structure and conservation, such as PolyPhen, SIFT and  
296 CADD, *in silico* analysis of the 3D crystal structure of PRPF31 can provide more accurate estimates  
297 of the pathogenic potential of missense mutations. However, this still only provides information  
298 about the effect of mutations on the protein in isolation. The elucidation of the structure of the entire  
299 intact spliceosomal complex provides new exciting opportunities for more accurate *in silico*  
300 modelling of the effect of missense mutations on PRPF31 and its protein-protein interactions  
301 (Bertram *et al.*, 2017). This structural analysis can predict effects on interactions with other proteins,  
302 as well as intramolecular disturbances caused by missense mutations. For example, one published  
303 variant in PRPF31 is in the C-terminal domain (Arg408Trp), outside of the functionally important  
304 Nop and coiled-coil domains and *in silico* analysis predicts that this missense mutation does not  
305 affect H bonding within PRPF31. Based on this analysis, it may be predicted that this change is  
306 unlikely to be pathogenic, but 3D analysis of the intact spliceosome predicts that this change affects  
307 binding of PRPF31 to PRPF6 (**Figure 3a**). We would predict that this change is pathogenic, and that  
308 missense variants outside the Nop and coiled-coil domains should not be dismissed as benign.

309 Using this 3D protein complex analysis, we predict a novel variant, Ile114Asn, found in a patient  
310 attending the genetics eye clinic at Bristol Eye Hospital, to be affecting H bonding within PRPF31  
311 and predict that this will affect protein folding and solubility (**Figure 4a-c**). Our *in vitro* studies  
312 confirm this (**Figures 5, 6**). Protein with this variant is found in the insoluble nuclear fraction, and  
313 this leads to cell death (**Figures 5, 6**).

314 In summary, we show that *in silico* modelling of the effect of missense variants on the 3D structure  
315 of the spliceosome contributes useful additional data to predictions of pathogenicity of novel  
316 variants. which are likely to affect protein folding and solubility. In the novel variant studied here,

317 the predictions from this *in silico* structural analysis were confirmed using *in vitro* testing. It is  
318 important to note that the spliceosome is a highly dynamic structure, and our 3D structural complex  
319 analysis only studies PRPF31 in one specific conformation, in the spliceosome primed for splicing  
320 (Bertram *et al.*, 2017). For truly accurate predictions of pathogenicity, the 3D structure of the  
321 spliceosome at different stages of activity will need to be studied, preferably using Molecular  
322 dynamic simulation (MDS) with a package such as GROMACS (Berendsen *et al.*, 1995) to provide  
323 deepest insights into effects of missense mutations. The publication of more cryo-EM resolved  
324 complexes relevant to development of ciliopathies, such as the intraflagellar transport (IFT)  
325 complexes (Jordan *et al.*, 2018) will further enhance our understanding of such conditions, and allow  
326 more accurate computational prediction of pathogenicity of variants.

327 Our data from this novel variant supports previous suggestions that haploinsufficiency is the common  
328 disease mechanism in RP11 rather than any dominant negative effects of missense variants (Wilkie *et al.*  
329 *et al.*, 2008; Abu-Safieh *et al.*, 2006; Sullivan *et al.*, 2006). We find that this missense variant affects  
330 protein solubility, effectively removing one copy of the protein from cells.

331 Considerable further work is required to elucidate why haploinsufficiency of PRPF31 causes retinal  
332 cells to degenerate, whether specific or global pre-mRNA splicing is affected, and why other tissues  
333 outside the retina are not affected by loss of protein.

334

### 335 **Figure and Table Legends**

#### 336 **Figure 1. Clinical characteristics of patient with *PRPF31* c.341T>A Ile114Asn variant, and** 337 **PolyPhen2 and conservation analysis of the variant**

338 (a) Family pedigree. Affected individuals in generation II had visual symptoms suggestive of retinitis  
339 pigmentosa and appear on both sides of the paternal grandparents of the proband. Arrow = proband  
340 (b) Images of clinical investigations conducted at visit in 2017. Upper panel: Red free fundus  
341 photographs show extensive bilateral retinal pigment disruption, especially nasally. Lower panel:  
342 Goldmann visual field images show bilateral tunnel vision with a small island of peripheral vision in  
343 the right eye. (c) PolyPhen2 score predicts this variant is probably damaging with a score of 0.963  
344 (top), alignment of PRPF31 sequence showing conservation of Ile114 and surrounding amino acids  
345 (bottom). Ile114 identity is conserved across tetrapods, from human to *Xenopus tropicalis*, and non-

## Modelling missense variants in PRPF31

346 polar hydrophobic similarity is conserved from yeast to human, with variations in highly derived  
347 insects (*Drosophila melanogaster*) and fish (*Fugu*).

348

### 349 **Figure 2. 3D cartoon representation of PRPF31, including published missense mutations**

350 Cartoon representation of alpha helical structure of PRPF31 (grey) and 15.5K/SNU13 (pink) with U4  
351 snRNA (orange backbone), with published missense mutations mapped onto the physical structure,  
352 with wild-type amino acid structure in green, and mutant amino acid structure overlaid in red.

353

### 354 **Figure 3. 3D cartoon representation of regions of PRPF31 with published missense mutations** 355 **and their interactions with other molecules within 4Å, and their polar contacts**

356 Cartoon representation of alpha helical structure of regions of PRPF31 (grey), with published  
357 missense mutations (a) Arg408Trp showing how this affects interaction with PRPF6 (blue) and (b)  
358 Gly261Arg showing how this affects interaction with PRPF8 (orange). Red asterisks are used to label  
359 where missense mutations introduce new H bonding. Cartoon representation of alpha helical  
360 structure of regions of PRPF31 (grey), with published missense mutations (c) Leu197, (d) Ala216Pro  
361 and (e) Ala291Pro showing effect of these missense mutation on loss of polar contacts within  
362 PRPF31. Wild-type amino acid structure is shown in green, and mutant amino acid structure overlaid  
363 in red.

### 364 **Figure 4. 3D cartoon representation of PRPF31 and variant Ile114Asn**

365 (a) Cartoon representation of alpha helical structure of PRPF31 (grey) and 15.5K/SNU13 (pink) with  
366 U4 snRNA (orange backbone), with published missense mutations mapped onto the physical  
367 structure, with wild-type amino acid structure in green, and mutant amino acid structure overlaid in  
368 red. Ile114Asn (black arrow) is mapped onto the structure with wild-type amino acid structure in  
369 green, and mutant amino acid structure overlaid in blue. (b) Cartoon representation of alpha helical  
370 structure of subregion of PRPF31 (grey), with Ile114Asn, showing proximity to Thr138 and Ala194,  
371 both of which are published sites of mutation in RP patients (c) Ile114Asn mapped onto the physical  
372 structure of PRPF31 with wild-type amino acid structure in green, and mutant amino acid structure  
373 overlaid in blue, and interactions within 4Å, predicted to affect H bonding within PRPF31. Green

374 regions of the alpha helix denote normal H bonding by Ile114, blue regions of the alpha helix denote  
375 novel H bonds of Asn114. Blue asterisks are used to label where missense mutation introduces new  
376 H bonding.

377 **Figure 5. *In vitro* characterisation of PRPF31 c.341T>A Ile114Asn variant**

378 (a) Immunofluorescence confocal images of RPE1 cells transfected with c-myc-tagged wild-type or  
379 mutant PRPF31, showing expression and localisation of PRPF31-cmyc over 24, 48 and 72 hours. c-  
380 myc PRPF31 is evenly distributed throughout the nuclei of cells transfected with WT plasmid at each  
381 time point, but is concentrated in the nuclei of a few cells in RPE cells transfected with the mutant  
382 plasmid. The number of c-myc positive nuclei is stable in WT cells, but decreases over time in  
383 mutant cells. (b) At 72 hours, nuclei staining shows many apoptotic nuclei (blue arrows) in the cells  
384 transfected with mutant PRPF31

385 **Figure 6. Western blots of protein extracted from HEK293 cells transfected with wild-type or**  
386 **c.341T>A PRPF31 tagged with c-myc**

387 (a) Cells treated with 30µM cycloheximide (CHX) over 6 hours, and soluble protein extracted from  
388 the whole cell showed stable levels of wild-type protein expression across the time course, and  
389 complete absence of mutant protein in the soluble whole cell fraction. β-actin is cytoplasmic loading  
390 control. (b) Cells treated with 30µM cycloheximide (CHX) over 6 hours, and soluble protein  
391 extracted from the nucleus showed stable levels of wild-type protein expression across the time  
392 course, and extremely low levels of mutant protein in the soluble nuclear fraction, except where some  
393 insoluble protein was accidentally loaded (4 hour). β-actin is cytoplasmic loading control. PCNA is  
394 nuclear loading control. (c) Cells treated with 30µM cycloheximide (CHX) over 6 hours, and both  
395 soluble and insoluble protein extracted nucleus showed similar levels of wild-type and mutant protein  
396 expression and stability. PCNA is nuclear loading control marker. (d) Fractionation shows that both  
397 mutant and wild-type PRPF31 are localised to the nucleus. β-actin is cytoplasmic loading control,  
398 PCNA is nuclear loading control.

399

400 **Supplementary Figure 1. 3D cartoon representation of PRPF31, including published missense**  
401 **mutations, in complex with U4 snRNA, 15.5K and PRPF6**

## Modelling missense variants in PRPF31

402 (a) Cartoon representation of alpha helical structure of PRPF31 (grey) and 15.5K/SNU13 (pink) with  
403 U4 snRNA (dark orange backbone), and PRPF6 (blue) with published missense mutations mapped  
404 onto the physical structure, with wild-type amino acid structure in green, and mutant amino acid  
405 structure overlaid in red. This shows that only Arg408Trp is in interacting proximity with PRPF6. (b)  
406 An alternative view of the same complex, highlighting that variants in the NOP domain (black arrow)  
407 and coiled-coil domain do not appear to interact with PRPF6 in this conformation

408

409 **Supplementary Figure 2. 3D cartoon representation of PRPF31, including published missense**  
410 **mutations, in complex with U4 snRNA, 15.5K, PRPF6 and PRPF8**

411 (a) Cartoon representation of alpha helical structure of PRPF31 (grey) and 15.5K/SNU13 (pink) with  
412 U4 snRNA (dark orange backbone), PRPF6 (blue), and PRPF8 (light orange) with published  
413 missense mutations mapped onto the physical structure, with wild-type amino acid structure in green,  
414 and mutant amino acid structure overlaid in red. This shows that only Gly261Arg is in interacting  
415 proximity with PRPF8. (b) An alternative view of the same complex, highlighting that only this  
416 Gly261Arg variant (black arrow) appears to interact with PRPF8 in this conformation

417

418

419

420

421

422

## 423 Author Contributions

424 GW and AC conceived of and designed the study.

425 NM, SH, NJ and AC examined the patient, coordinated genetic testing and analysed patient genetic  
426 data.

427 GW and LN carried out in silico and in vitro experiments.

428 GW, LN, NM and AC prepared figures.

429 GW and AC wrote the paper.

430 SH reviewed the paper.

### 431 **Funding**

432 Dr Liliya Nazlamova and Dr Gabrielle Wheway are supported by National Eye Research Centre  
 433 Small Award SAC019, Wellcome Trust Seed Award in Science 204378/Z/16/Z and UWE Bristol  
 434 Quality Research funds.

435

| cDNA variant | protein variant | Found in family or singleton?     | Original reference(s)                                            |
|--------------|-----------------|-----------------------------------|------------------------------------------------------------------|
| c.413C>A     | Thr138Lys       | Large family                      | Waseem et al, 2007                                               |
| c.581C>A     | Ala194Glu       | Single affected individual (SP42) | Vithana et al, 2001                                              |
| c.590T>C     | Leu197Pro       | Large generation                  | Bryant et al, 2018                                               |
| c.646G>C     | Ala216Pro       | Huge family (AD29)                | Vithana et al, 2001                                              |
| c.781G>C     | Gly261Arg       | Single affected individual        | Xiao et al, 2017                                                 |
| c.862C>T     | Arg288Trp       | Single affected individual        | Coussa et al, 2015                                               |
| c.871G>C     | Ala291Pro       | Single affected individual        | Sullivan et al, 2006                                             |
| c.895T>C     | Cys299Arg       | 3 independent families            | Sullivan et al 2006; Xu et al., 2012; Martin-Merida et al., 2018 |
| c.896G>A     | Cys299Tyr       | Large family                      | Bhatia et al, 2018                                               |
| c.1222C>T    | Arg408Trp       | Single affected individual        | Xiao et al, 2017                                                 |
| c.1373A>T    | Gln458Leu       | Single affected                   | Xiao et al, 2017                                                 |



## Modelling missense variants in *PRPF31*

|  |  |            |  |
|--|--|------------|--|
|  |  | individual |  |
|--|--|------------|--|

436 **Table 1. Summary of published missense mutations in *PRPF31***

| cDNA variant | protein variant | Predicted effect on splicing (Human Splicing Finder) | Notes                                                                  | Summary - effect on splicing? | Estimate of pathogenicity |
|--------------|-----------------|------------------------------------------------------|------------------------------------------------------------------------|-------------------------------|---------------------------|
| c.413C>A     | Thr138Lys       | Potential alteration of splicing                     |                                                                        | Maybe                         | Pathogenic                |
| c.581C>A     | Ala194Glu       | Potential alteration of splicing                     | Functional characterisation shows functional effect of missense change | No                            | Pathogenic                |
| c.590T>C     | Leu197Pro       | Potential alteration of splicing                     | Functional characterisation shows functional effect of missense change | No                            | Pathogenic                |
| c.646G>C     | Ala216Pro       | Potential alteration of splicing                     | Functional characterisation shows functional effect of missense change | No                            | Pathogenic                |
| c.781G>C     | Gly261Arg       | No impact on splicing                                |                                                                        | No                            | Pathogenic                |
| c.862C>T     | Arg288Trp       | Potential alteration of splicing                     |                                                                        | Maybe                         | Pathogenic                |
| c.871G>C     | Ala291Pro       | No impact on splicing                                |                                                                        | No                            | Pathogenic                |
| c.895T>C     | Cys299Arg       | No impact on splicing                                |                                                                        | No                            | Pathogenic                |
| c.896G>A     | Cys299Tyr       | Potential alteration of splicing                     |                                                                        | Maybe                         | Pathogenic                |
| c.1222C>T    | Arg408Trp       | Potential alteration of splicing                     |                                                                        | No                            | Pathogenic                |
| c.1373A>T    | Gln458Leu       | <b>Most probably affecting splicing</b>              |                                                                        | <b>Yes</b>                    | Pathogenic                |

437 **Table 2. Mutations in *PRPF31* annotated as missense, and their predicted impact on splicing**

438 All published missense mutations in *PRPF31*, and their predicted impact on splicing, according to  
 439 Human Splicing Finder.

440

441

442

443

## Reference List

444

445 **Abu-Safieh, L., Vithana, E. N., Mantel, I., Holder, G. E., Pelosini, L., Bird, A. C., et al. (2006).**  
446 **A large deletion in the adRP gene PRPF31: evidence that haploinsufficiency is the cause of**  
447 **disease***Mol. Vis.* **12**. doi: v12/a44 [pii]

448 Adzhubei, I. A., Schmidt, S., Peshkin, L., Ramensky, V. E., Gerasimova, A., Bork, P., et al. (2010).  
449 A method and server for predicting damaging missense mutations*Nat. Methods* **74**. doi:  
450 10.1038/nmeth0410-248 [doi]

451 Audo, I., Bujakowska, K., Mohand-Said, S., Lancelot, M. E., Moskova-Doumanova, V., Waseem,  
452 N. H., et al. (2010). Prevalence and novelty of PRPF31 mutations in French autosomal dominant rod-  
453 cone dystrophy patients and a review of published reports*BMC Med. Genet.* **11**. doi: 10.1186/1471-  
454 2350-11-145 [doi]

455 Berendsen, H. J. C., van der Spoel, D., and van Drunen, R. (1995). GROMACS: A message-passing  
456 parallel molecular dynamics implementation *Computer Physics Communications* **91**, 43-56. doi:  
457 [https://doi.org/10.1016/0010-4655\(95\)00042-E](https://doi.org/10.1016/0010-4655(95)00042-E)

458 Bertram, K., Agafonov, D. E., Dybkov, O., Haselbach, D., Leelaram, M. N., Will, C. L., et al.  
459 (2017). Cryo-EM Structure of a Pre-catalytic Human Spliceosome Primed for Activation*Cell* **1704**.  
460 doi: S0092-8674(17)30818-8 [pii]

461 Cooper, G. M. and Shendure, J. (2011). Needles in stacks of needles: finding disease-causal variants  
462 in a wealth of genomic data*Nat. Rev. Genet.* **129**. doi: 10.1038/nrg3046 [doi]

463 Coussa, R. G., Chakarova, C., Ajlan, R., Taha, M., Kavalec, C., Gomolin, J., et al. (2015). Genotype  
464 and Phenotype Studies in Autosomal Dominant Retinitis Pigmentosa (adRP) of the French Canadian  
465 Founder Population*Invest. Ophthalmol. Vis. Sci.* **5613**. doi: 10.1167/iovs.15-17104 [doi]

466 Daiger, S. P., Bowne, S. J., and Sullivan, L. S. (2014). Genes and Mutations Causing Autosomal  
467 Dominant Retinitis Pigmentosa*Cold Spring Harb Perspect. Med.* **510**. doi:  
468 10.1101/cshperspect.a017129 [doi]

469 Deery, E. C., Vithana, E. N., Newbold, R. J., Gallon, V. A., Bhattacharya, S. S., Warren, M. J., et al.  
470 (2002). Disease mechanism for retinitis pigmentosa (RP11) caused by mutations in the splicing factor  
471 gene PRPF31*Hum. Mol. Genet.* **1125**

472 Desmet, F. O., Hamroun, D., Lalande, M., Collod-Beroud, G., Claustres, M., and Beroud, C. (2009).  
473 Human Splicing Finder: an online bioinformatics tool to predict splicing signals*Nucleic Acids Res.*  
474 **379**. doi: 10.1093/nar/gkp215 [doi]

475 Gnad, F., Baucom, A., Mukhyala, K., Manning, G., and Zhang, Z. (2013). Assessment of  
476 computational methods for predicting the effects of missense mutations in human cancers*BMC*  
477 *Genomics* **14 Suppl 3**. doi: 10.1186/1471-2164-14-S3-S7 [doi]

## Modelling missense variants in PRPF31

- 478 Golovleva, I., Kohn, L., Burstedt, M., Daiger, S., and Sandgren, O. (2010). Mutation spectra in  
479 autosomal dominant and recessive retinitis pigmentosa in northern Sweden *Adv. Exp. Med. Biol.* **664**.  
480 doi: 10.1007/978-1-4419-1399-9\_29 [doi]
- 481 Gonzalez-Perez, A. and Lopez-Bigas, N. (2011). Improving the assessment of the outcome of  
482 nonsynonymous SNVs with a consensus deleteriousness score, Condel *Am. J. Hum. Genet.* **88**. doi:  
483 10.1016/j.ajhg.2011.03.004 [doi]
- 484 Greenberg, J., Bartmann, L., Ramesar, R., and Beighton, P. (1993). Retinitis pigmentosa in southern  
485 Africa *Clin. Genet.* **44**
- 486 Haim, M. (1993). Retinitis pigmentosa: problems associated with genetic classification *Clin. Genet.*  
487 **44**
- 488 Hartong, D. T., Berson, E. L., and Dryja, T. P. (2006). Retinitis pigmentosa *The Lancet* **368**:9549.  
489 doi: [http://dx.doi.org/10.1016/S0140-6736\(06\)69740-7](http://dx.doi.org/10.1016/S0140-6736(06)69740-7)
- 490 Jeffrey, G. A. (1997). *An introduction to hydrogen bonding*: Oxford University Press.
- 491 Jin, Z. B., Mandai, M., Yokota, T., Higuchi, K., Ohmori, K., Ohtsuki, F., *et al.* (2008). Identifying  
492 pathogenic genetic background of simplex or multiplex retinitis pigmentosa patients: a large scale  
493 mutation screening study *J. Med. Genet.* **45**. doi: 10.1136/jmg.2007.056416 [doi]
- 494 Jordan, M. A., Diener, D. R., Stepanek, L., and Pigino, G. (2018). The cryo-EM structure of  
495 intraflagellar transport trains reveals how dynein is inactivated to ensure unidirectional anterograde  
496 movement in cilia *Nat. Cell Biol.* doi: 10.1038/s41556-018-0213-1 [doi]
- 497 Kircher, M., Witten, D. M., Jain, P., O'Roak, B. J., Cooper, G. M., and Shendure, J. (2014). A  
498 general framework for estimating the relative pathogenicity of human genetic variants *Nat. Genet.*  
499 **46**. doi: 10.1038/ng.2892 [doi]
- 500 Landrum, M. J., Lee, J. M., Benson, M., Brown, G., Chao, C., Chitipiralla, S., *et al.* (2016). ClinVar:  
501 public archive of interpretations of clinically relevant variants *Nucleic Acids Res.* **44**:D1. doi:  
502 10.1093/nar/gkv1222 [doi]
- 503 Landrum, M. J., Lee, J. M., Riley, G. R., Jang, W., Rubinstein, W. S., Church, D. M., *et al.* (2014).  
504 ClinVar: public archive of relationships among sequence variation and human phenotype *Nucleic*  
505 *Acids Res.* **42**:Database issue. doi: 10.1093/nar/gkt1113 [doi]
- 506 Lim, K. P., Yip, S. P., Cheung, S. C., Leung, K. W., Lam, S. T., and To, C. H. (2009). Novel  
507 PRPF31 and PRPH2 mutations and co-occurrence of PRPF31 and RHO mutations in Chinese  
508 patients with retinitis pigmentosa *Arch. Ophthalmol.* **127**:6. doi: 10.1001/archophthalmol.2009.112  
509 [doi]
- 510 Liu, S., Li, P., Dybkov, O., Nottrott, S., Hartmuth, K., Luhrmann, R., *et al.* (2007). Binding of the  
511 human Prp31 Nop domain to a composite RNA-protein platform in U4 snRNP *Science* **316**:5821. doi:  
512 10.1126/science.1151115 [pii]
- 513 Makarova, O. V., Makarov, E. M., Liu, S., Vornlocher, H. P., and Luhrmann, R. (2002). Protein  
514 61K, encoded by a gene (PRPF31) linked to autosomal dominant retinitis pigmentosa, is required for

- 515 U4/U6\*U5 tri-snRNP formation and pre-mRNA splicing *EMBO J.* **215**. doi:  
516 10.1093/emboj/21.5.1148 [doi]
- 517 Martin-Merida, I., Aguilera-Garcia, D., Fernandez-San Jose, P., Blanco-Kelly, F., Zurita, O.,  
518 Almoguera, B., *et al.* (2018). Toward the Mutational Landscape of Autosomal Dominant Retinitis  
519 Pigmentosa: A Comprehensive Analysis of 258 Spanish Families *Invest. Ophthalmol. Vis. Sci.* **596**.  
520 doi: 10.1167/iovs.18-23854 [doi]
- 521 Miosge, L. A., Field, M. A., Sontani, Y., Cho, V., Johnson, S., Palkova, A., *et al.* (2015).  
522 Comparison of predicted and actual consequences of missense mutations *Proc. Natl. Acad. Sci. U. S.*  
523 *A.* **11237**. doi: 10.1073/pnas.1511585112 [doi]
- 524 Mockel, A., Perdomo, Y., Stutzmann, F., Letsch, J., Marion, V., and Dollfus, H. (2011). Retinal  
525 dystrophy in Bardet-Biedl syndrome and related syndromic ciliopathies *Prog. Retin. Eye Res.* **304**.  
526 doi: 10.1016/j.preteyeres.2011.03.001 [doi]
- 527 Mordes, D., Yuan, L., Xu, L., Kawada, M., Molday, R. S., and Wu, J. Y. (2007). Identification of  
528 photoreceptor genes affected by PRPF31 mutations associated with autosomal dominant retinitis  
529 pigmentosa *Neurobiol. Dis.* **262**. doi: S0969-9961(06)00197-5 [pii]
- 530 Najera, C., Millan, J. M., Beneyto, M., and Prieto, F. (1995). Epidemiology of retinitis pigmentosa  
531 in the Valencian community (Spain) *Genet. Epidemiol.* **121**. doi: 10.1002/gepi.1370120105 [doi]
- 532 Rio Frio, T., Wade, N. M., Ransijn, A., Berson, E. L., Beckmann, J. S., and Rivolta, C. (2008).  
533 Premature termination codons in PRPF31 cause retinitis pigmentosa via haploinsufficiency due to  
534 nonsense-mediated mRNA decay *J. Clin. Invest.* **1184**. doi: 10.1172/JCI34211 [doi]
- 535 Rivolta, C., McGee, T. L., Rio Frio, T., Jensen, R. V., Berson, E. L., and Dryja, T. P. (2006).  
536 Variation in retinitis pigmentosa-11 (PRPF31 or RP11) gene expression between symptomatic and  
537 asymptomatic patients with dominant RP11 mutations *Hum. Mutat.* **277**. doi: 10.1002/humu.20325  
538 [doi]
- 539 Ruzickova, S. and Stanek, D. (2016). Mutations in spliceosomal proteins and retina  
540 degeneration *RNA Biol.* doi: 10.1080/15476286.2016.1191735 [doi]
- 541 Schaffert, N., Hossbach, M., Heintzmann, R., Achsel, T., and Luhrmann, R. (2004). RNAi  
542 knockdown of hPrp31 leads to an accumulation of U4/U6 di-snRNPs in Cajal bodies *EMBO J.* **2315**.  
543 doi: 10.1038/sj.emboj.7600296 [doi]
- 544 Sharon, D. and Banin, E. (2015). Nonsyndromic retinitis pigmentosa is highly prevalent in the  
545 Jerusalem region with a high frequency of founder mutations *Mol. Vis.* **21**
- 546 Sullivan, L. S., Bowne, S. J., Birch, D. G., Highbanks-Wheaton, D., Heckenlively, J. R., Lewis, R.  
547 A., *et al.* (2006). Prevalence of disease-causing mutations in families with autosomal dominant  
548 retinitis pigmentosa: a screen of known genes in 200 families *Invest. Ophthalmol. Vis. Sci.* **477**. doi:  
549 47/7/3052 [pii]
- 550 Sullivan, L. S., Bowne, S. J., Reeves, M. J., Blain, D., Goetz, K., Ndifor, V., *et al.* (2013).  
551 Prevalence of mutations in eyeGENE probands with a diagnosis of autosomal dominant retinitis  
552 pigmentosa *Invest. Ophthalmol. Vis. Sci.* **549**. doi: 10.1167/iovs.13-12605 [doi]

## Modelling missense variants in PRPF31

- 553 Van Cauwenbergh, C., Coppieters, F., Roels, D., De Jaegere, S., Flipts, H., De Zaeytijd, J., *et al.*  
554 (2017). Mutations in Splicing Factor Genes Are a Major Cause of Autosomal Dominant Retinitis  
555 Pigmentosa in Belgian Families *PLoS One* **12**. doi: 10.1371/journal.pone.0170038 [doi]
- 556 Verbakel, S. K., van Huet, R. A. C., Boon, C. J. F., den Hollander, A. I., Collin, R. W. J., Klaver, C.  
557 C. W., *et al.* (2018). Non-syndromic retinitis pigmentosa *Prog. Retin. Eye Res.* doi: S1350-  
558 9462(17)30072-1 [pii]
- 559 Wang, E. T., Sandberg, R., Luo, S., Khrebtukova, I., Zhang, L., Mayr, C., *et al.* (2008). Alternative  
560 isoform regulation in human tissue transcriptomes *Nature* **456**7221. doi: 10.1038/nature07509 [doi]
- 561 Wheway, G., Schmidts, M., Mans, D. A., Szymanska, K., Nguyen, T. M., Racher, H., *et al.* (2015).  
562 An siRNA-based functional genomics screen for the identification of regulators of ciliogenesis and  
563 ciliopathy genes *Nat. Cell Biol.* **17**. doi: 10.1038/ncb3201 [doi]
- 564 Wilkie, S. E., Vaclavik, V., Wu, H., Bujakowska, K., Chakarova, C. F., Bhattacharya, S. S., *et al.*  
565 (2008). Disease mechanism for retinitis pigmentosa (RP11) caused by missense mutations in the  
566 splicing factor gene PRPF31 *Mol. Vis.* **14**
- 567 Will, C. L. and Luhrmann, R. (2011). Spliceosome structure and function *Cold Spring Harb*  
568 *Perspect. Biol.* **37**. doi: 10.1101/cshperspect.a003707 [doi]
- 569 Xiao, X., Cao, Y., Zhang, Z., Xu, Y., Zheng, Y., Chen, L. J., *et al.* (2017). Novel Mutations in  
570 PRPF31 Causing Retinitis Pigmentosa Identified Using Whole-Exome Sequencing *Invest.*  
571 *Ophthalmol. Vis. Sci.* **58**14. doi: 10.1167/iovs.17-22952 [doi]
- 572 Xu, F., Sui, R., Liang, X., Li, H., Jiang, R., and Dong, F. (2012). Novel PRPF31 mutations  
573 associated with Chinese autosomal dominant retinitis pigmentosa patients *Mol. Vis.* **18**
- 574 Yuan, L., Kawada, M., Havlioglu, N., Tang, H., and Wu, J. Y. (2005). Mutations in PRPF31 inhibit  
575 pre-mRNA splicing of rhodopsin gene and cause apoptosis of retinal cells *J. Neurosci.* **25**3. doi:  
576 25/3/748 [pii]
- 577 Zhang, Q., Xu, M., Verriotto, J. D., Li, Y., Wang, H., Gan, L., *et al.* (2016). Next-generation  
578 sequencing-based molecular diagnosis of 35 Hispanic retinitis pigmentosa probands *Sci. Rep.* **6**. doi:  
579 10.1038/srep32792 [doi]
- 580

a

bioRxiv preprint doi: <https://doi.org/10.1101/480348>; this version posted December 2, 2018. The copyright holder for this preprint (which was not certified by peer review) is the author/funder, who has granted bioRxiv a license to display the preprint in perpetuity. It is made available under aCC-BY-NC-ND 4.0 International license.

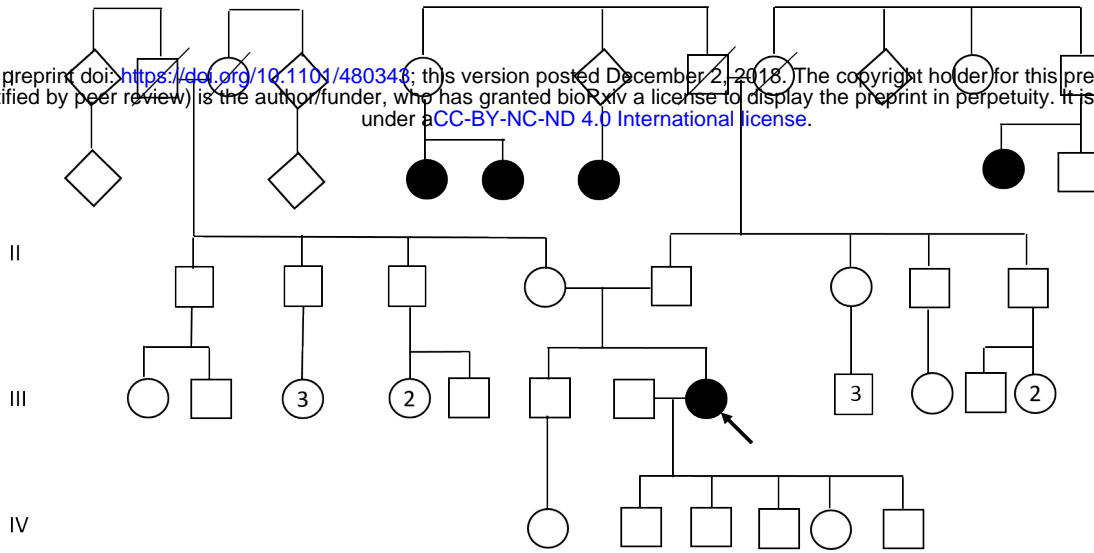

b

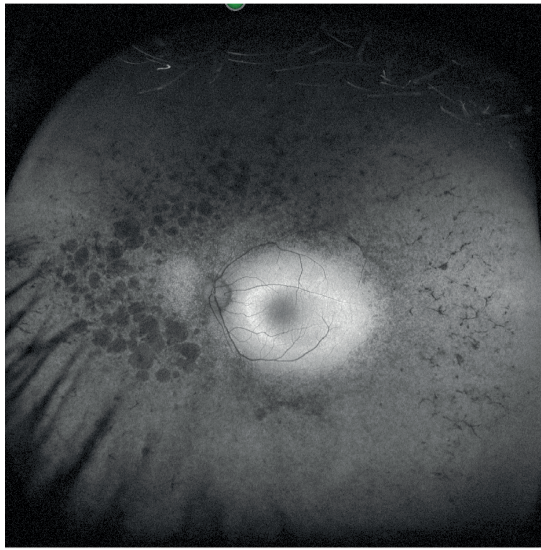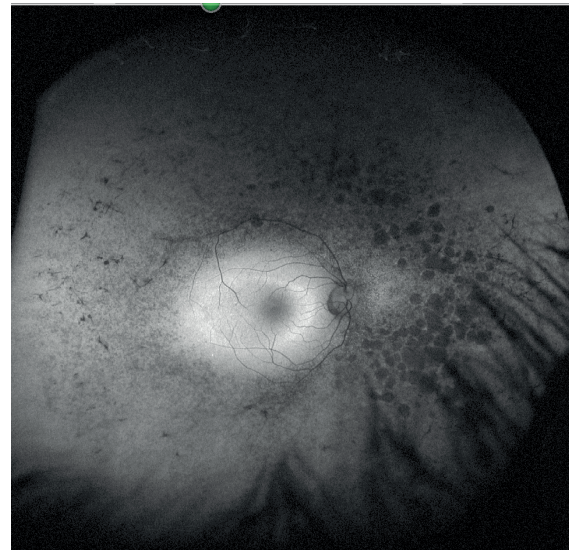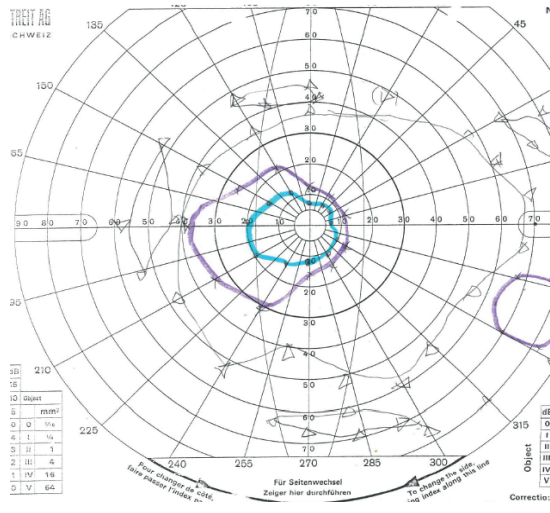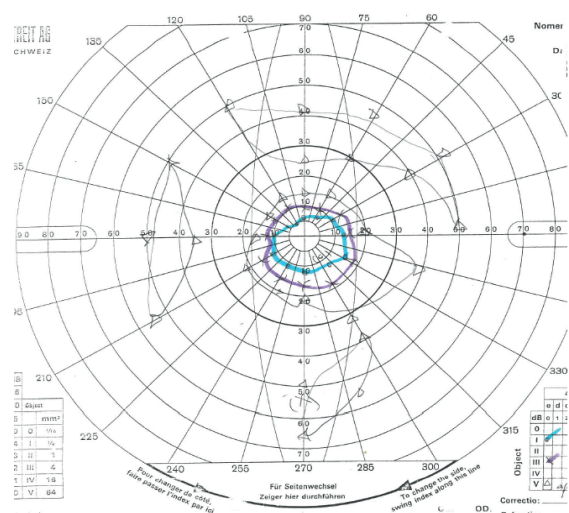

c

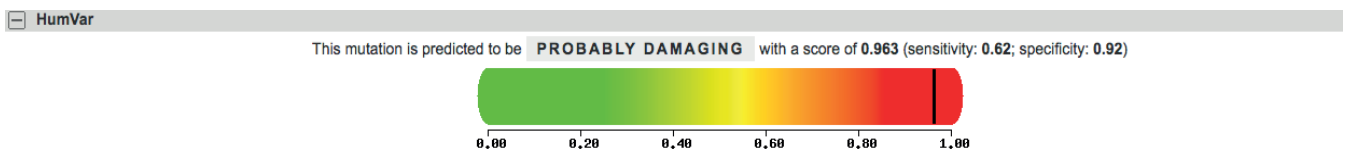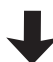

| Species                          | Accession          | Sequence                                                                                                                                                                                                                                                                                                                              |
|----------------------------------|--------------------|---------------------------------------------------------------------------------------------------------------------------------------------------------------------------------------------------------------------------------------------------------------------------------------------------------------------------------------|
| <i>H. sapiens</i>                | QUERY              | ASEVMG <b>P</b> VEA <b>A</b> PEYR <b>V</b> IVDANNL <b>T</b> VEIENELN <b>I</b> IHK <b>F</b> I <b>R</b> DK <b>Y</b> SK <b>R</b> PE <b>E</b> LES <b>L</b> VP <b>N</b> ALD <b>Y</b> IR <b>T</b> V <b>K</b> EL <b>G</b> NS <b>-</b> LD <b>-</b> K <b>C</b> K                                                                               |
| <i>C. jacchus</i> (marmoset)     | sp F6S071#1        | ASEVMG <b>P</b> VEA <b>A</b> PEYR <b>V</b> IVDANNL <b>T</b> VEIENELN <b>I</b> IHK <b>F</b> I <b>R</b> DK <b>Y</b> SK <b>R</b> PE <b>E</b> LES <b>L</b> VP <b>N</b> ALD <b>Y</b> IR <b>T</b> V <b>K</b> EL <b>G</b> NS <b>-</b> LD <b>-</b> K <b>C</b> K                                                                               |
| <i>O. cuniculus</i> (rabbit)     | sp G1SGN5#1        | AAEVMG <b>P</b> VEA <b>A</b> PEYR <b>V</b> IVDANNL <b>T</b> VEIENELN <b>I</b> IHK <b>F</b> I <b>R</b> DK <b>Y</b> SK <b>R</b> PE <b>E</b> LES <b>L</b> VP <b>N</b> ALD <b>Y</b> IR <b>T</b> V <b>K</b> EL <b>G</b> NS <b>-</b> LD <b>-</b> K <b>C</b> K                                                                               |
| <i>X. laevis</i>                 | sp Q5U5C5#1        | ASEVMG <b>P</b> VEA <b>A</b> PEY <b>K</b> VI <b>V</b> DANNL <b>T</b> VEIENELN <b>I</b> IHK <b>F</b> I <b>R</b> DK <b>Y</b> SK <b>R</b> PE <b>E</b> LES <b>L</b> VP <b>N</b> ALD <b>Y</b> IR <b>T</b> V <b>K</b> EL <b>G</b> NN <b>-</b> LD <b>-</b> K <b>C</b> K                                                                      |
| <i>X. tropicalis</i>             | sp Q6NVP6#1        | ASEVMG <b>P</b> VEA <b>A</b> PEY <b>K</b> VI <b>V</b> DANNL <b>T</b> VEIENELN <b>I</b> IHK <b>F</b> I <b>R</b> DK <b>Y</b> SK <b>R</b> PE <b>E</b> LES <b>L</b> VP <b>N</b> ALD <b>Y</b> IR <b>T</b> V <b>K</b> EL <b>G</b> NN <b>-</b> LD <b>-</b> K <b>C</b> K                                                                      |
| <i>Danio rario</i> (zebrafish)   | sp Q7SXM7#1        | NSEV <b>S</b> GP <b>V</b> EA <b>D</b> PEY <b>R</b> L <b>V</b> IA <b>N</b> NL <b>T</b> VEIENELN <b>I</b> IHK <b>F</b> V <b>R</b> DK <b>Y</b> SK <b>R</b> PE <b>E</b> LES <b>L</b> VP <b>N</b> ALD <b>Y</b> IR <b>T</b> V <b>K</b> EL <b>G</b> NN <b>-</b> LD <b>-</b> K <b>C</b> K                                                     |
| <i>Fugu</i> (pufferfish)         | sp UPI00016E1A05#1 | NSD <b>V</b> CG <b>P</b> VEA <b>D</b> PEY <b>R</b> L <b>V</b> IA <b>N</b> NL <b>T</b> VEIENELN <b>I</b> IHK <b>F</b> T <b>R</b> DK <b>Y</b> SK <b>R</b> PE <b>E</b> LES <b>L</b> VP <b>D</b> SL <b>D</b> Y <b>I</b> R <b>T</b> V <b>K</b> EL <b>G</b> NN <b>-</b> LD <b>-</b> K <b>C</b> K                                            |
| <i>Drosophila melanogaster</i>   | sp B4L132#1        | AAEML <b>G</b> S <b>V</b> ES <b>D</b> PEY <b>C</b> L <b>V</b> IA <b>N</b> A <b>I</b> A <b>V</b> D <b>I</b> DN <b>E</b> IS <b>I</b> IHK <b>E</b> T <b>K</b> E <b>K</b> Y <b>Q</b> K <b>R</b> PE <b>I</b> DS <b>L</b> IV <b>G</b> E <b>I</b> E <b>Y</b> LL <b>A</b> V <b>K</b> EL <b>G</b> ND <b>-</b> LD <b>-</b> Q <b>V</b> K         |
| <i>A. queenslandica</i> (sponge) | sp UPI00021A4342#1 | -GEM <b>S</b> GP <b>V</b> EA <b>D</b> PEY <b>Q</b> L <b>V</b> ES <b>N</b> MM <b>V</b> E <b>I</b> DN <b>E</b> I <b>Y</b> T <b>I</b> H <b>K</b> Y <b>V</b> K <b>D</b> L <b>Y</b> SK <b>R</b> PE <b>E</b> LS <b>M</b> V <b>Y</b> T <b>P</b> I <b>E</b> Y <b>V</b> K <b>T</b> V <b>O</b> LL <b>O</b> ND <b>-</b> LD <b>-</b> V <b>T</b> K |
| <i>C. elegans</i>                | sp Q9N592#1        | EVK <b>V</b> T <b>A</b> PL <b>E</b> AD <b>P</b> Q <b>Y</b> KL <b>I</b> V <b>K</b> LS <b>H</b> V <b>A</b> AD <b>I</b> DN <b>E</b> IN <b>V</b> IHK <b>F</b> V <b>R</b> DK <b>Y</b> E <b>K</b> R <b>P</b> E <b>E</b> L <b>T</b> LP <b>N</b> AL <b>T</b> Y <b>L</b> A <b>T</b> V <b>O</b> LL <b>G</b> NE <b>-</b> IN <b>-</b> SK <b>V</b> |

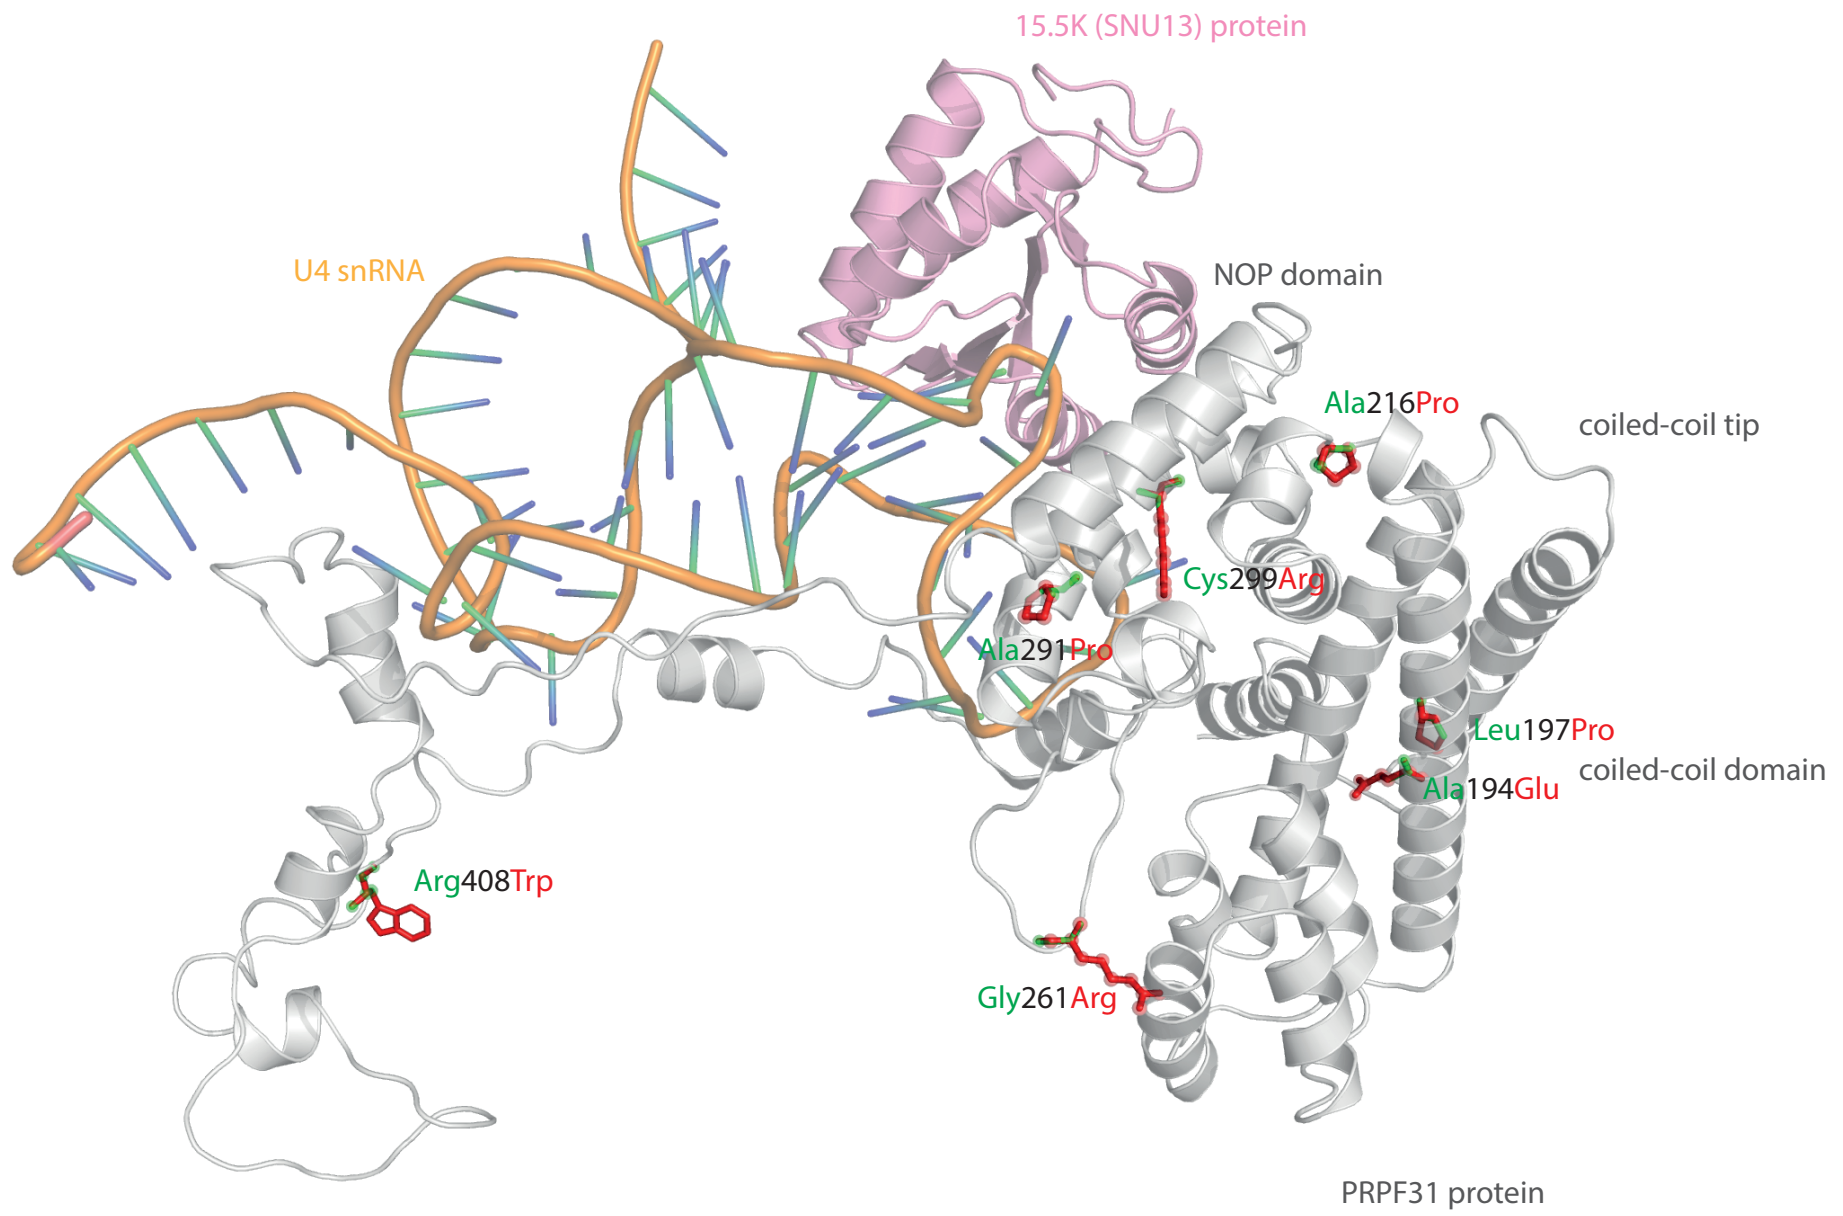

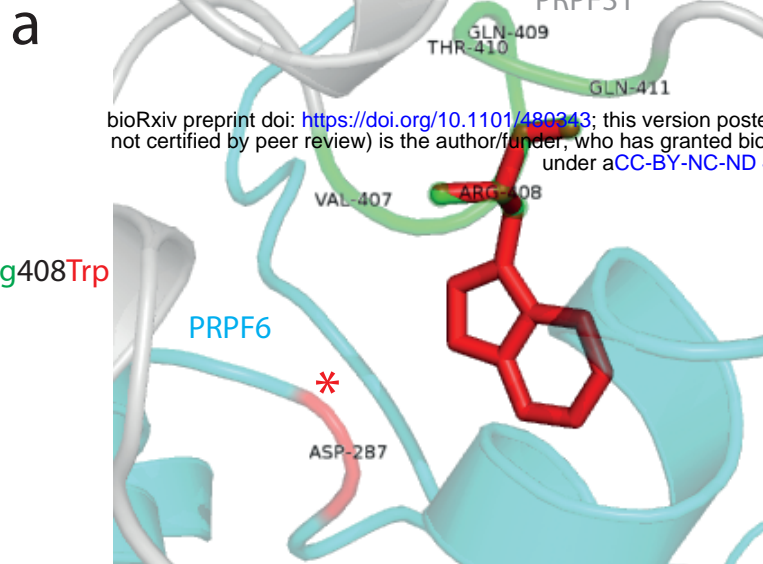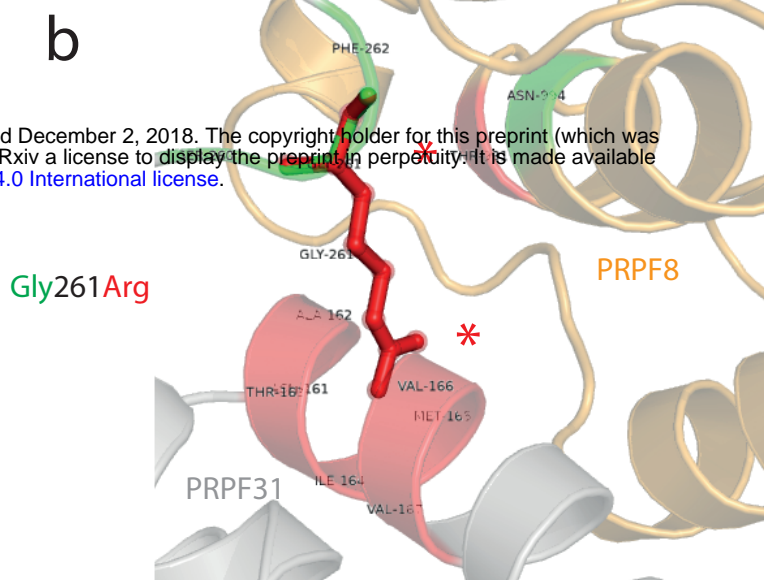

--- polar contacts

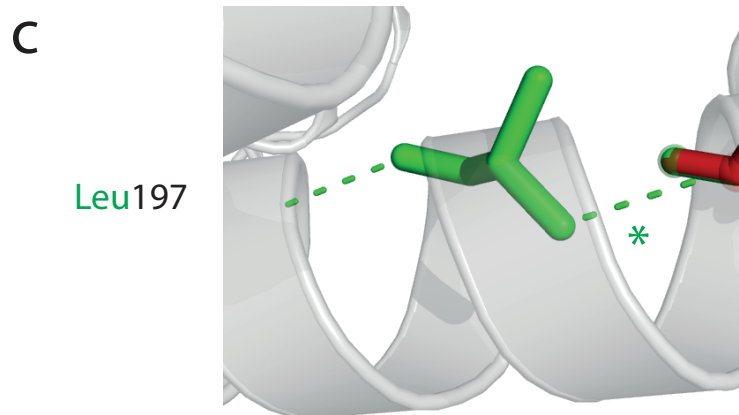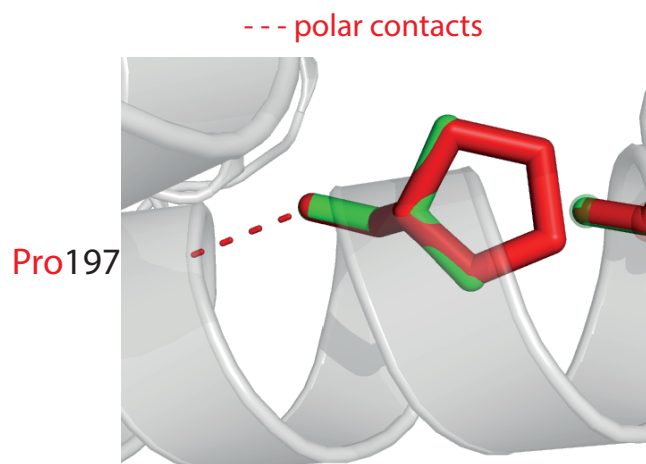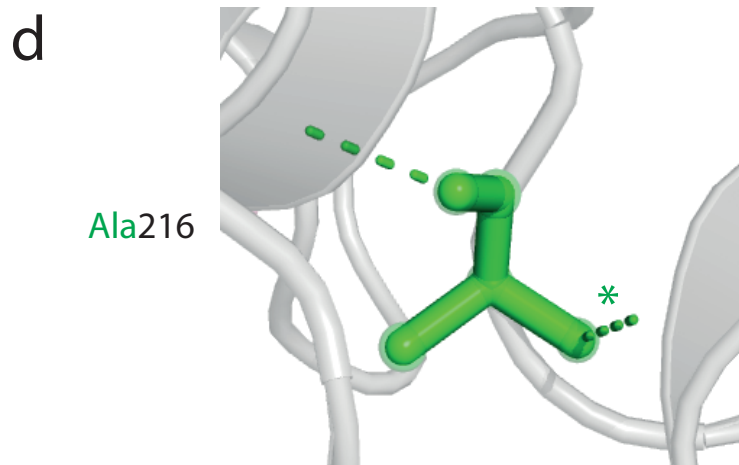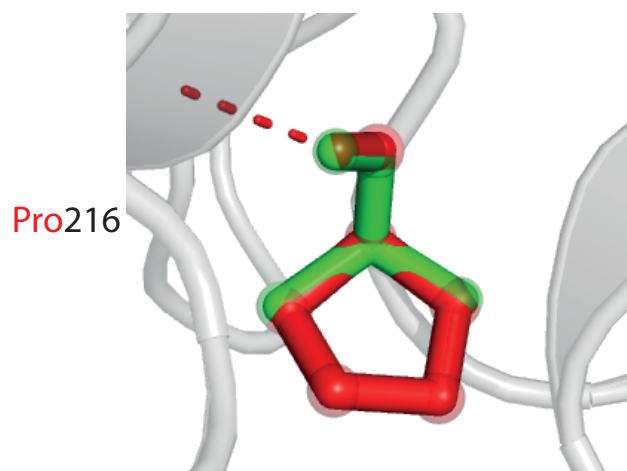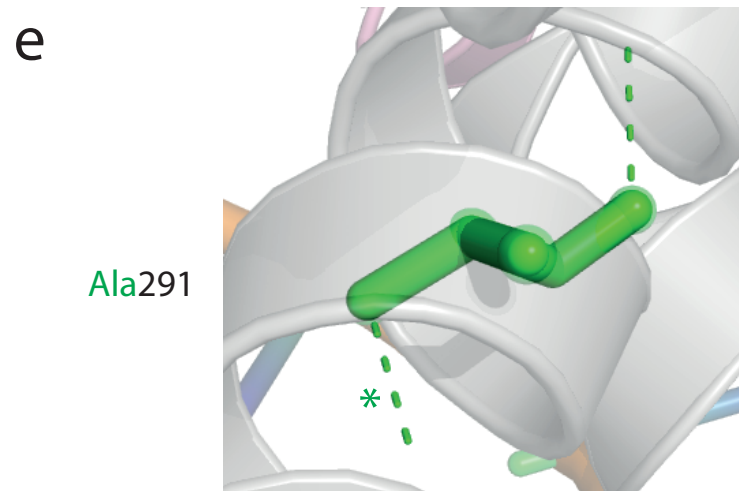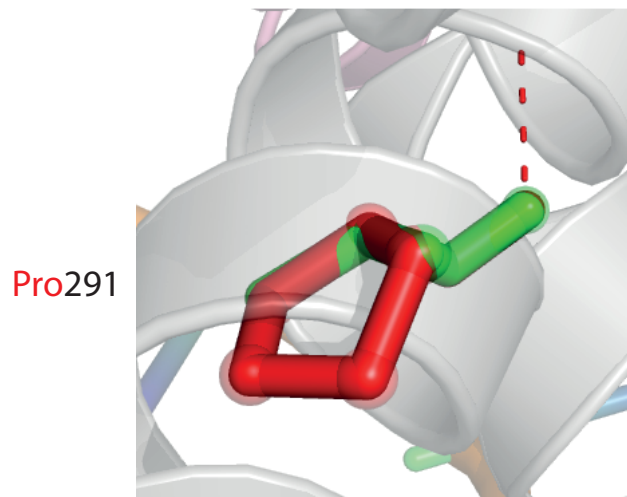

bioRxiv preprint doi: <https://doi.org/10.1101/480343>; this version posted December 2, 2018. The copyright holder for this preprint (which was not certified by peer review) is the author/funder, who has granted bioRxiv a license to display the preprint in perpetuity. It is made available under aCC-BY-NC-ND 4.0 International license.



**a**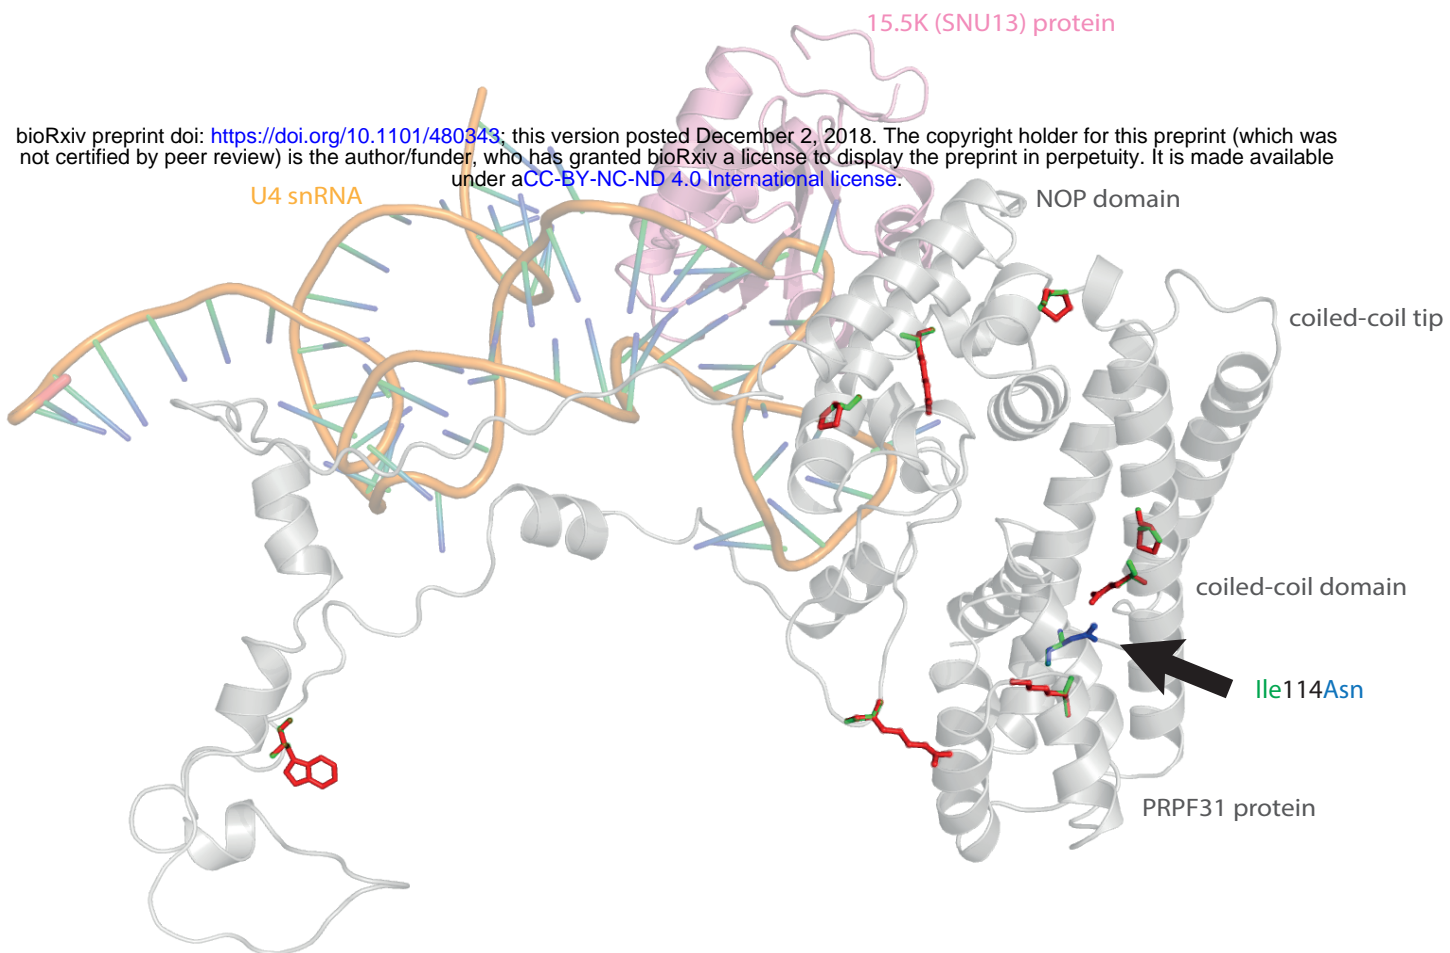**b**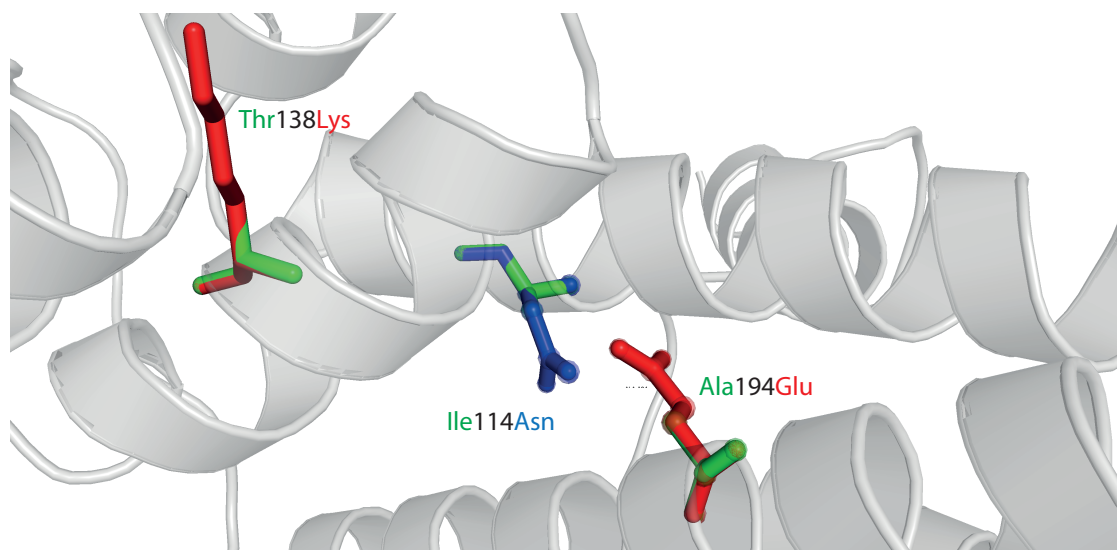**c**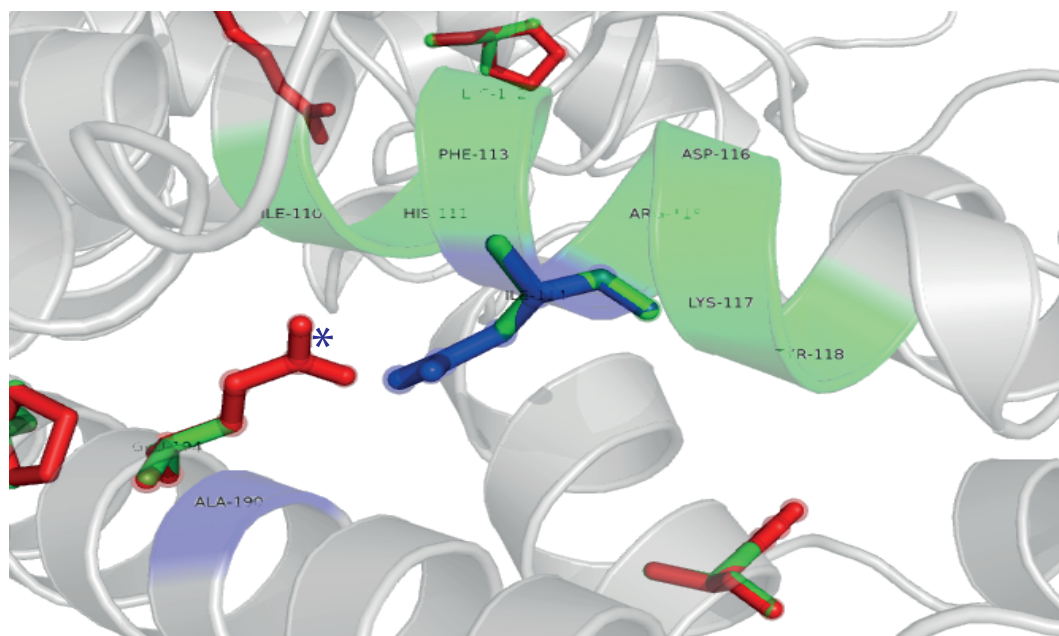

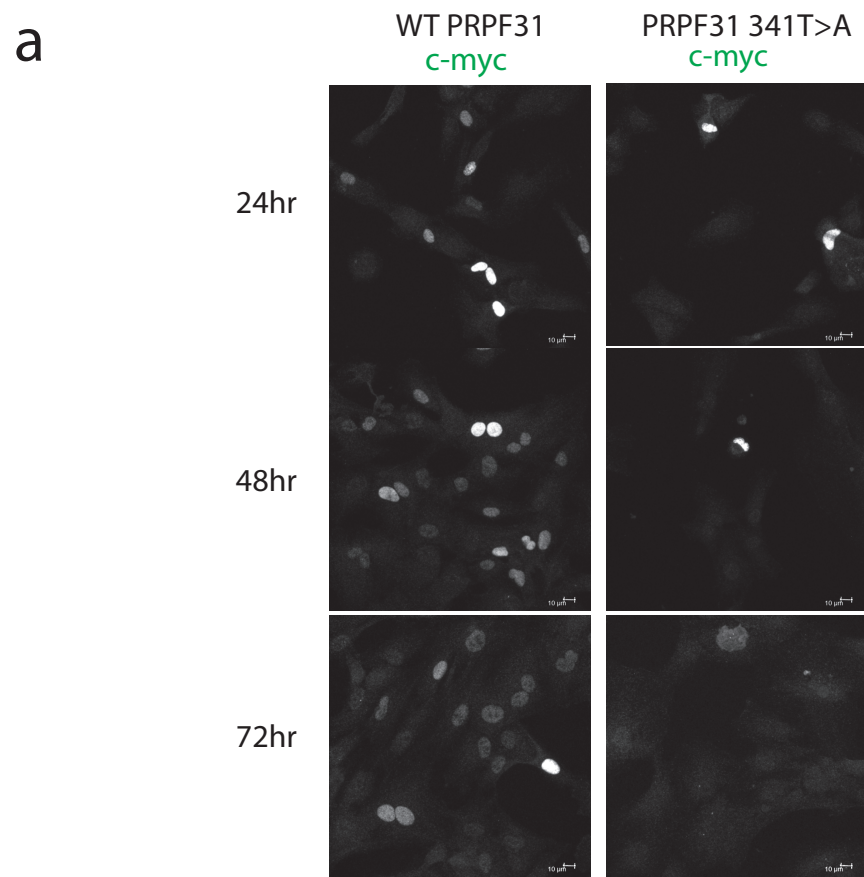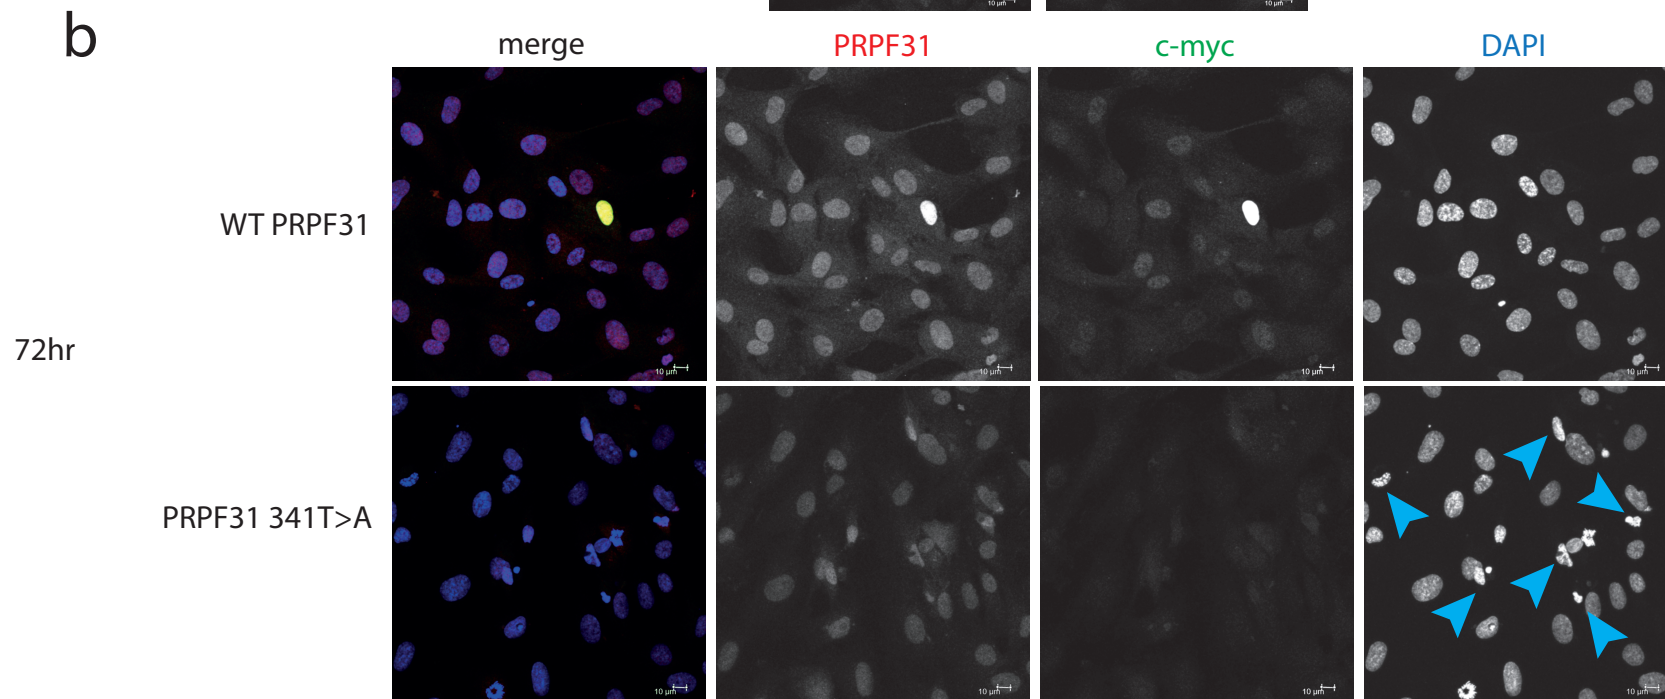

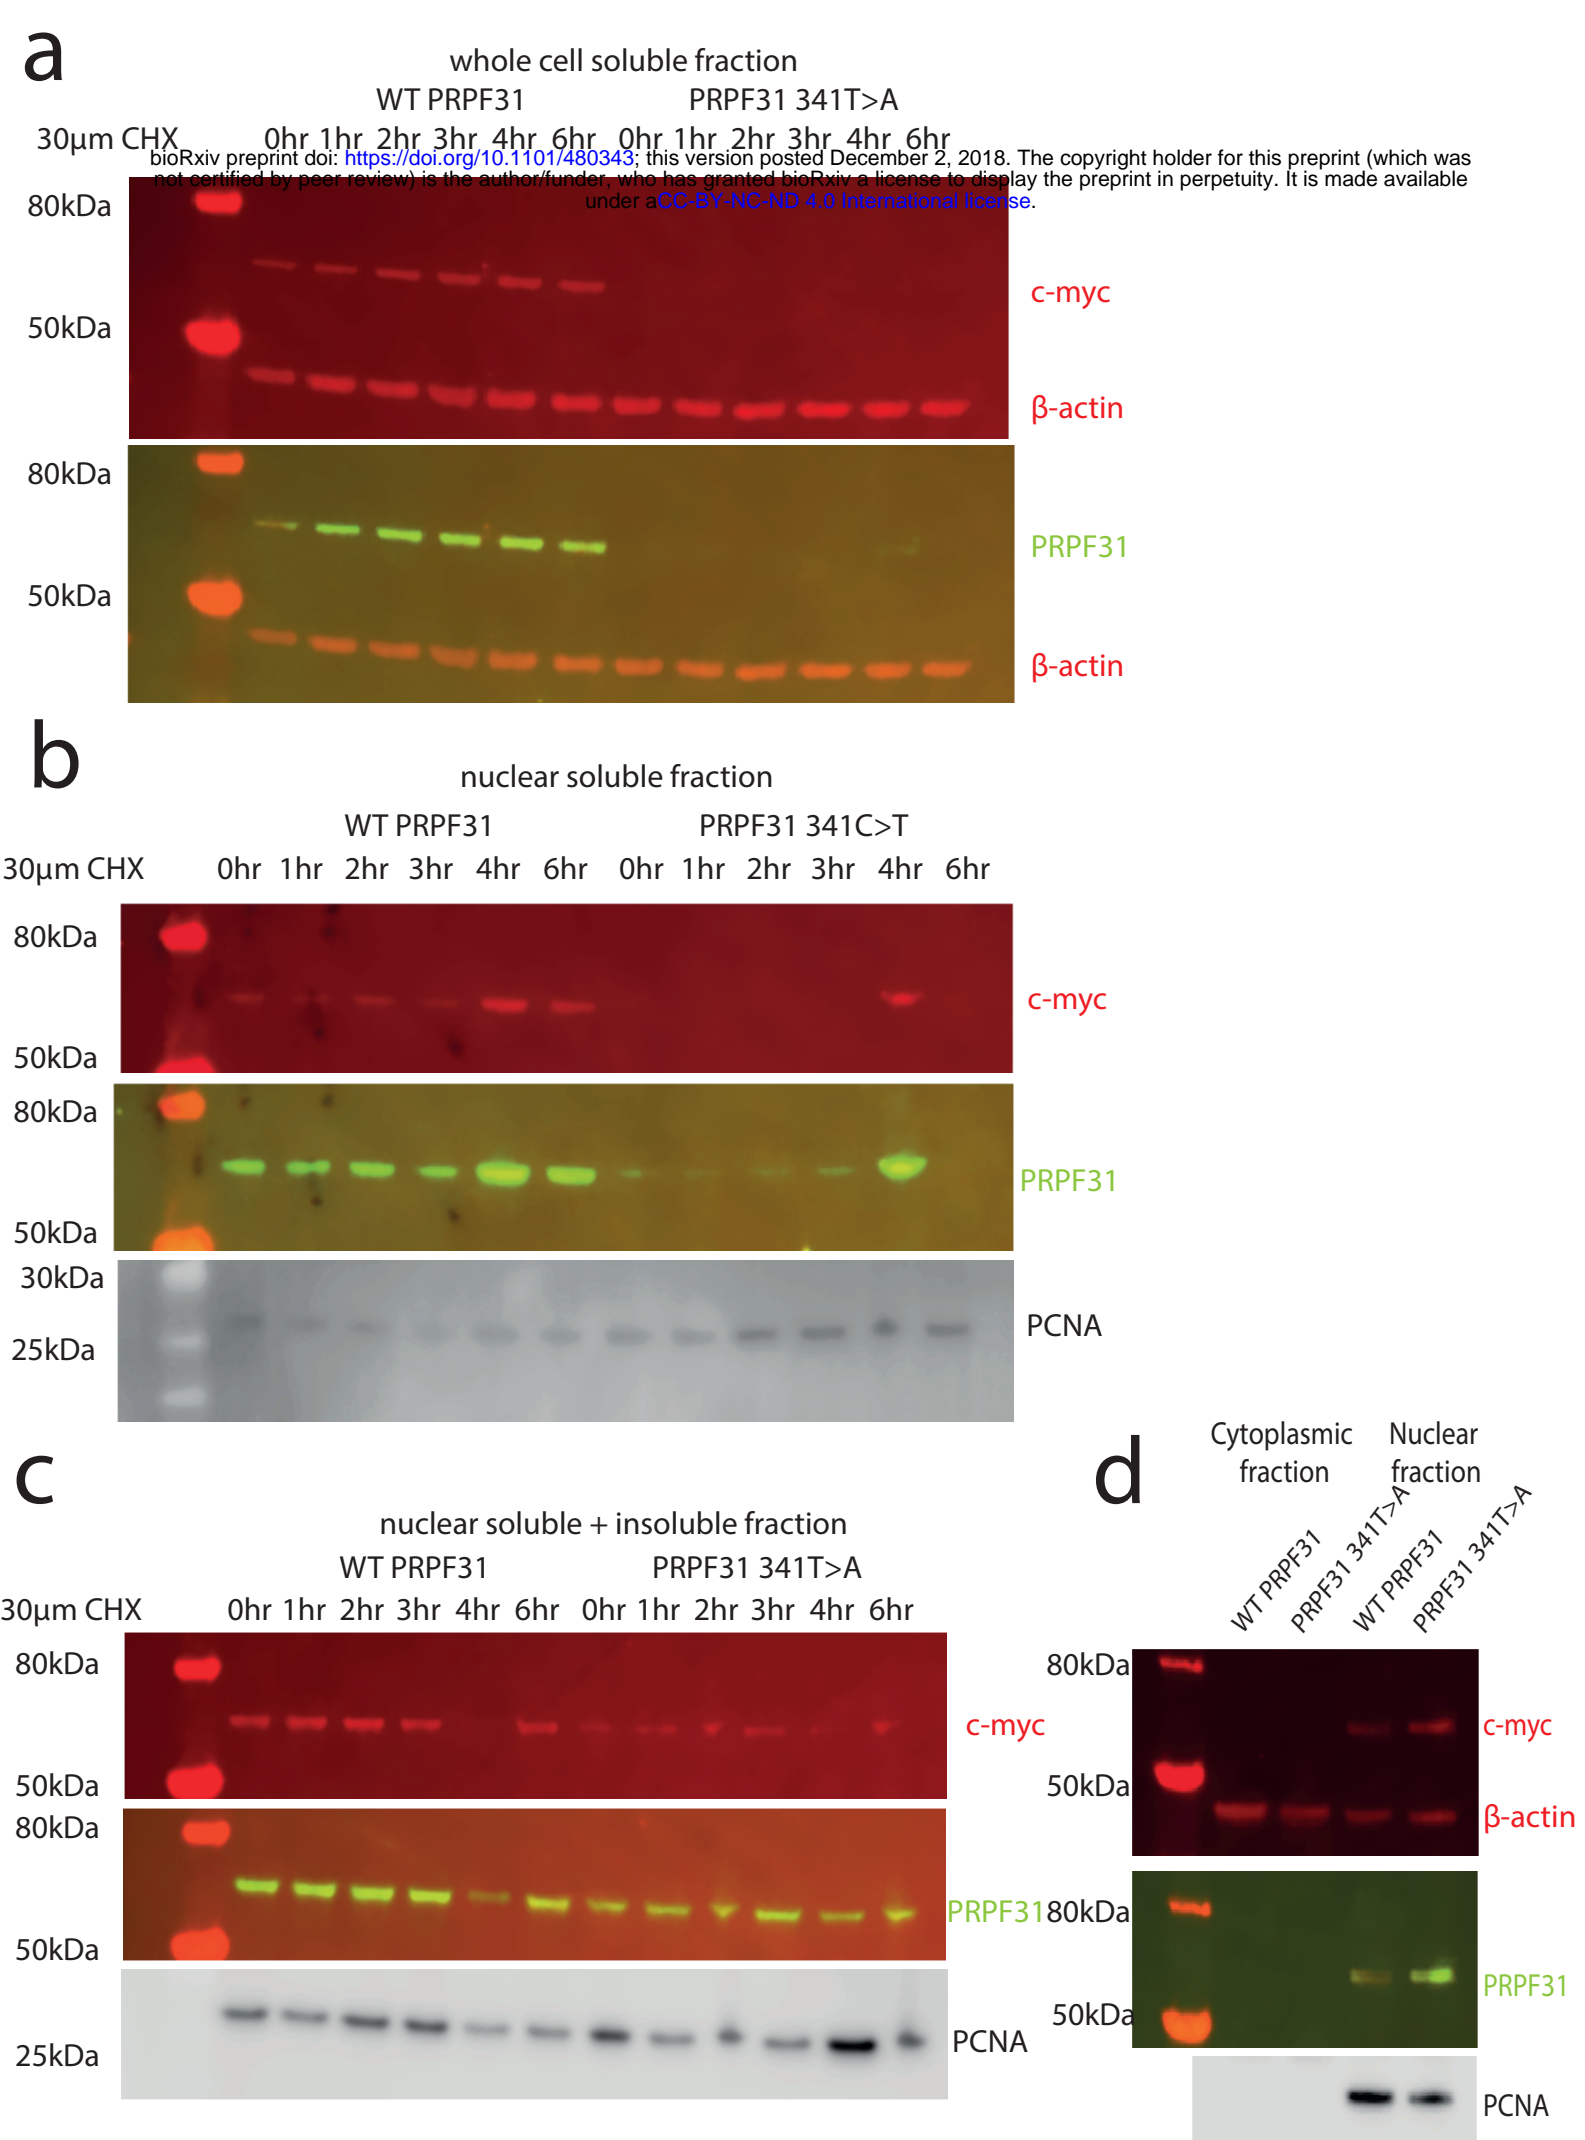

Source: https://www.biorxiv.org/content/10.1101/480343v1.full.pdf
